# Supplementary material
Source: ML conference proceedings conference paper supplement (https://proceedings.neurips.cc/paper_files/paper/2023/hash/96d328a1f6d8396d8c8a62f2beee252a-Abstract.html)
Supplement: Supplementary file 1 [file 96d328a1f6d8396d8c8a62f2beee252a-Supplemental-Conference.pdf]

## 427 A Distortion Analysis for 0-PLF-FMD

Recall the definition of Wasserstein-2 distance [26] as follows. For given distributions  $P_{X_j}$  and  $P_{\tilde{X}_j}$ , let

$$W_2^2(P_{\tilde{X}_j}, P_{X_j}) := \inf \mathbb{E}[\|X_j - \tilde{X}_j\|^2], \quad (18)$$

428 where the infimum is over all joint distributions of  $(X_j, \tilde{X}_j)$  with marginals  $P_{X_j}$  and  $P_{\tilde{X}_j}$ .

**Theorem 1** *The set  $\Phi_{D^0}(P_{M|XK})$  is characterized as follows:*

$$\Phi_{D^0}(P_{M|XK}) = \{D : D_j \geq \mathbb{E}_P[\|X_j - \tilde{X}_j\|^2] + W_2^2(P_{\tilde{X}_j}, P_{X_j}), j = 1, 2, 3\}, \quad (19)$$

Furthermore, we also have that:

$$\Phi_{D^0}(P_{M|XK}) \supseteq \{D : D_j \geq 2\mathbb{E}_P[\|X_j - \tilde{X}_j\|^2], j = 1, 2, 3\}, \quad (20)$$

429 i.e., minimum achievable distortion with 0-PLF-FMD is at most twice the MMSE distortion.

*Proof:* Define

$$\mathcal{D}^0 := \{D : D_j \geq \mathbb{E}[\|X_j - \tilde{X}_j\|^2] + W_2^2(P_{\tilde{X}_j}, P_{X_j}), j = 1, 2, 3\}. \quad (21)$$

First, we show that  $\Phi_{D^0}(P_{M|XK}) \subseteq \mathcal{D}^0$ . For any  $D \in \Phi_{D^0}(P_{M|XK})$ , there exists  $\hat{X}_{D^0} = (\hat{X}_{D_1^0}, \hat{X}_{D_2^0}, \hat{X}_{D_3^0})$  jointly distributed with  $(M, X, K)$  such that

$$\mathbb{E}[\|X_j - \hat{X}_{D_j^0}\|^2] \leq D_j, \quad j = 1, 2, 3, \quad (22)$$

$$P_{X_j} = P_{\hat{X}_{D_j^0}}. \quad (23)$$

Then, for example, the analysis for the second frame is as follows

$$D_2 \geq \mathbb{E}[\|X_2 - \hat{X}_{D_2^0}\|^2] \quad (24)$$

$$= \mathbb{E}[\|(X_2 - \tilde{X}_2) - (\hat{X}_{D_2^0} - \tilde{X}_2)\|^2] \quad (25)$$

$$= \mathbb{E}[\|X_2 - \tilde{X}_2\|^2] + \mathbb{E}[\|\tilde{X}_2 - \hat{X}_{D_2^0}\|^2] \quad (26)$$

$$\geq \mathbb{E}[\|X_2 - \tilde{X}_2\|^2] + W_2^2(P_{\tilde{X}_2}, P_{\hat{X}_{D_2^0}}) \quad (27)$$

$$= \mathbb{E}[\|X_2 - \tilde{X}_2\|^2] + W_2^2(P_{\tilde{X}_2}, P_{X_2}), \quad (28)$$

430 where (26) holds because both  $\tilde{X}_2$  and  $\hat{X}_{D_2^0}$  are functions of  $(M_1, M_2, K)$  and thus the MMSE  
 431  $(X_2 - \tilde{X}_2)$  is uncorrelated with  $(\hat{X}_{D_2^0} - \tilde{X}_2)$ ; (28) follows because the 0-PLF-FMD implies that  
 432  $P_{\hat{X}_{D_2^0}} = P_{X_2}$ . Following similar steps for other frames, we get  $\Phi_{D^0}(P_{M|XK}) \subseteq \mathcal{D}^0$ .

Next, we show that  $\mathcal{D}^0 \subseteq \Phi_{D^0}(P_{M|XK})$ . Assume that  $D \in \mathcal{D}^0$ . Let  $\hat{X}_1^*$  be an auxiliary random variable jointly distributed with  $(M_1, K)$  such that it satisfies the following conditions

$$P_{\hat{X}_1^*} = P_{X_1}, \quad (29)$$

and

$$P_{\tilde{X}_1 \hat{X}_1^*} = \arg \inf_{\substack{\tilde{P}_{\tilde{X}_1 \hat{X}_1^*}: \\ \tilde{P}_{\tilde{X}_1} = P_{\tilde{X}_1} \\ \tilde{P}_{\hat{X}_1^*} = P_{\hat{X}_1^*}}} \mathbb{E}_{\tilde{P}}[\|\tilde{X}_1 - \hat{X}_1^*\|^2]. \quad (30)$$

Moreover, let  $\hat{X}_2^*$  be an auxiliary random variable jointly distributed with  $(M_1, M_2, K)$  such that the following two conditions are satisfied

$$P_{\hat{X}_2^*} = P_{X_2}, \quad (31)$$

and

$$P_{\tilde{X}_2 \hat{X}_2^*} = \arg \inf_{\substack{\tilde{P}_{\tilde{X}_2 \hat{X}_2^*}: \\ \tilde{P}_{\tilde{X}_2} = P_{\tilde{X}_2} \\ \tilde{P}_{\hat{X}_2^*} = P_{\hat{X}_2^*}}} \mathbb{E}_{\tilde{P}}[\|\tilde{X}_2 - \hat{X}_2^*\|^2]. \quad (32)$$

Similarly, we define  $\hat{X}_3^*$ . Now, notice that since  $D \in \mathcal{D}^0$ , we have:

$$D_2 \geq \mathbb{E}[\|X_2 - \tilde{X}_2\|^2] + W_2^2(P_{\tilde{X}_2}, P_{X_2}). \quad (33)$$

It then directly follows that

$$\mathbb{E}[\|X_2 - \hat{X}_2^*\|^2] = \mathbb{E}[\|X_2 - \tilde{X}_2\|^2] + \mathbb{E}[\|\tilde{X}_2 - \hat{X}_2^*\|^2] \quad (34)$$

$$= \mathbb{E}[\|X_2 - \tilde{X}_2\|^2] + W_2^2(P_{\tilde{X}_2}, P_{\hat{X}_2^*}) \quad (35)$$

$$= \mathbb{E}[\|X_2 - \tilde{X}_2\|^2] + W_2^2(P_{\tilde{X}_2}, P_{X_2}) \quad (36)$$

$$\leq D_2, \quad (37)$$

where

- (34) follows because  $\tilde{X}_2$  and  $\hat{X}_2^*$  are functions of  $(M_1, M_2, K)$  and thus the MMSE  $(X_2 - \tilde{X}_2)$  is uncorrelated with  $(\hat{X}_2^* - \tilde{X}_2)$ ;
- (35) follows from (32);
- (36) follows because  $P_{\hat{X}_2^*} = P_{X_2}$ .

Following similar steps for other frames, we get  $D \in \Phi_{\mathcal{D}^0}(P_{X_i|X})$ .

Now, notice that  $W_2^2(P_{\tilde{X}_2}, P_{X_2}) \leq \mathbb{E}[\|X_2 - \tilde{X}_2\|^2]$  since the Wasserstein-2 distance takes the infimum over all possible joint distributions  $(X_2, \tilde{X}_2)$ , but the expectation in  $\mathbb{E}[\|X_2 - \tilde{X}_2\|^2]$  is taken over the given  $P_{X_2\tilde{X}_2}$ . Thus, we get

$$\mathbb{E}[\|X_2 - \tilde{X}_2\|^2] + W_2^2(P_{\tilde{X}_2}, P_{X_2}) \leq 2\mathbb{E}[\|X_2 - \tilde{X}_2\|^2]. \quad (38)$$

This concludes the proof. ■

## B Distortion Analysis for 0-PLF-JD

Let  $\hat{X}_1^*$  be defined as in (29)–(30). Moreover, let  $\hat{X}_2^*$  be an auxiliary random variable jointly distributed with  $(M_1, M_2, K)$  such that the following conditions are satisfied

$$P_{\hat{X}_2^*|\hat{X}_1^*=x_1} = P_{X_2|X_1=x_1}, \quad \forall x_1 \in \mathcal{X}_1, \quad (39)$$

and

$$P_{\tilde{X}_2\hat{X}_2^*|\hat{X}_1^*=x_1} = \arg \inf_{\substack{\bar{P}_{\tilde{X}_2\hat{X}_2^*|\hat{X}_1^*=x_1} \\ \bar{P}_{\tilde{X}_2|\hat{X}_1^*=x_1} = P_{\tilde{X}_2|\hat{X}_1^*=x_1} \\ \bar{P}_{\hat{X}_2^*|\hat{X}_1^*=x_1} = P_{\hat{X}_2^*|\hat{X}_1^*=x_1}}} \mathbb{E}_{\bar{P}}[\|\tilde{X}_2 - \hat{X}_2^*\|^2 | \hat{X}_1^* = x_1], \quad \forall x_1 \in \mathcal{X}_1. \quad (40)$$

Then, the following result holds.

**Theorem 2** *We have*

$$\begin{aligned} \Phi_{\mathcal{D}^0}^{joint}(P_{M|XK}) &\supseteq \{D : D_1 \geq \mathbb{E}[\|X_1 - \tilde{X}_1\|^2] + W_2^2(P_{\tilde{X}_1}, P_{X_1}), \\ D_2 &\geq \mathbb{E}[\|X_2 - \tilde{X}_2\|^2] + \sum_{x_1} P_{X_1}(x_1) W_2^2(P_{\tilde{X}_2|\hat{X}_1^*=x_1}, P_{X_2|X_1=x_1}), \\ D_3 &\geq \mathbb{E}[\|X_3 - \tilde{X}_3\|^2] + \sum_{x_1, x_2} P_{X_1X_2}(x_1, x_2) W_2^2(P_{\tilde{X}_3|\hat{X}_1^*=x_1, \hat{X}_2^*=x_2}, P_{X_3|X_1=x_1, X_2=x_2})\}. \end{aligned} \quad (41)$$

*Proof:* Define

$$\begin{aligned} \mathcal{D}_{\text{joint}}^0 &:= \{D : D_1 \geq \mathbb{E}[\|X_1 - \tilde{X}_1\|^2] + W_2^2(P_{\tilde{X}_1}, P_{X_1}), \\ D_2 &\geq \mathbb{E}[\|X_2 - \tilde{X}_2\|^2] + \sum_{x_1} P_{X_1}(x_1) W_2^2(P_{\tilde{X}_2|\hat{X}_1^*=x_1}, P_{X_2|X_1=x_1}), \\ D_3 &\geq \mathbb{E}[\|X_3 - \tilde{X}_3\|^2] + \sum_{x_1, x_2} P_{X_1X_2}(x_1, x_2) W_2^2(P_{\tilde{X}_3|\hat{X}_1^*=x_1, \hat{X}_2^*=x_2}, P_{X_3|X_1=x_1, X_2=x_2})\}. \end{aligned} \quad (42)$$

Now, assume that  $D \in \mathcal{D}_{\text{joint}}^0$ . For the first frame, recall that  $\hat{X}_1^*$  is an auxiliary random variable jointly distributed with  $(M_1, K)$  such that it satisfies (29)–(30). From similar steps to (34)–(36), it then follows that

$$\mathbb{E}[\|X_1 - \hat{X}_1^*\|^2] = \mathbb{E}[\|X_1 - \tilde{X}_1\|^2] + W_2^2(P_{\tilde{X}_1}, P_{X_1}) \quad (43)$$

$$\leq D_1. \quad (44)$$

For the second frame, since  $D \in \mathcal{D}_{\text{joint}}^0$ , we have:

$$D_2 \geq \mathbb{E}[\|X_2 - \tilde{X}_2\|^2] + \sum_{x_1} P_{X_1}(x_1) W_2^2(P_{\tilde{X}_2|X_1=x_1}, P_{X_2|X_1=x_1}). \quad (45)$$

Recall that  $\hat{X}_2^*$  is an auxiliary random variable jointly distributed with  $(M_1, M_2, K)$  such that (39)–(40) hold. It then directly follows that

$$\mathbb{E}[\|X_2 - \hat{X}_2^*\|^2] = \mathbb{E}[\|X_2 - \tilde{X}_2\|^2] + \mathbb{E}[\|\tilde{X}_2 - \hat{X}_2^*\|^2] \quad (46)$$

$$= \mathbb{E}[\|X_2 - \tilde{X}_2\|^2] + \sum_{x_1} P_{\hat{X}_1^*}(x_1) \mathbb{E}[\|\tilde{X}_2 - \hat{X}_2^*\|^2 | \hat{X}_1^* = x_1] \quad (47)$$

$$= \mathbb{E}[\|X_2 - \tilde{X}_2\|^2] + \sum_{x_1} P_{\hat{X}_1^*}(x_1) W_2^2(P_{\tilde{X}_2|\hat{X}_1^*=x_1}, P_{\hat{X}_2^*|\hat{X}_1^*=x_1}) \quad (48)$$

$$= \mathbb{E}[\|X_2 - \tilde{X}_2\|^2] + \sum_{x_1} P_{X_1}(x_1) W_2^2(P_{\tilde{X}_2|\hat{X}_1^*=x_1}, P_{X_2|X_1=x_1}), \quad (49)$$

where

- (46) follows because  $\tilde{X}_2$  and  $\hat{X}_2^*$  are functions of  $(M_1, M_2, K)$  and thus the MMSE  $(X_2 - \tilde{X}_2)$  is uncorrelated with  $(\hat{X}_2^* - \tilde{X}_2)$ ,
- (48) follows from (40),
- (49) follows because  $P_{\hat{X}_1^* \hat{X}_2^*} = P_{X_1 X_2}$ .

Following similar steps for the third frame, we get  $D \in \Phi_{D^0}(P_{M|XK})$ . This concludes the proof. ■

### B.1 A Counterexample for Factor-Two Bound in Case of 0-PLF-JD

Assume that we have only two frames, i.e.,  $D_3 \rightarrow \infty$ . Let  $M_1$  be independent of  $X_1$  and  $M_2 = X_2$ . Then, we have  $\tilde{X}_1 = \emptyset$  and  $\tilde{X}_2 = X_2$ . Consider the achievable distortion region of Theorem 2. The distortion of the first step is given by the following

$$\mathbb{E}[\|X_1 - \tilde{X}_1\|^2] + W_2^2(P_{\tilde{X}_1}, P_{X_1}) = 2\mathbb{E}[X_1^2]. \quad (50)$$

For the second frame, we have

$$\begin{aligned} & \mathbb{E}[\|X_2 - \tilde{X}_2\|^2] + \sum_{x_1} P_{X_1}(x_1) W_2^2(P_{\tilde{X}_2|\hat{X}_1^*=x_1}, P_{X_2|X_1=x_1}) \\ &= \sum_{x_1} P_{X_1}(x_1) W_2^2(P_{X_2|\hat{X}_1^*=x_1}, P_{X_2|X_1=x_1}) \end{aligned} \quad (51)$$

$$= \sum_{x_1} P_{X_1}(x_1) W_2^2(P_{X_2}, P_{X_2|X_1=x_1}), \quad (52)$$

where (51) follows because  $\tilde{X}_2 = X_2$  and (52) follows because  $X_2$  is independent of  $\hat{X}_1^*$  ( $M_1$  is independent of  $X_1$ , then  $\hat{X}_1^*$ , which is a function of  $(M_1, K)$ , would be independent of  $X_1$  and hence independent of  $X_2$ ).

Now, notice that the MMSE distortion of the second step is zero since  $\tilde{X}_2 = X_2$ . However, the achievable distortion of the second step for the reconstruction satisfying 0-PLF JD is given in (52) which clearly does not satisfy the factor-two bound.

## C Fixed Encoders Operating at Low rate regime

We consider the class of noisy encoders where the encoder distribution can be written as follows

$$P_{X_j|M_1\dots M_j K}^{\text{noisy}} = (1 - \mu)P_{X_j} + \mu Q_{X_j|M_1\dots M_j K}^{\text{noisy}}, \quad j = 1, 2, 3. \quad (53)$$

where  $\mu$  is a sufficiently small constant and the distribution  $Q^{\text{noisy}}(\cdot)$  could be arbitrary conditional distribution with same marginal as  $P_{X_j}$ .

**Theorem 3** For the class of encoders given by (53), we have

$$\Phi_{D^0}^{\text{joint}}(P_{M|XK}^{\text{noisy}}) \supseteq \{D : D_j \geq 2\mathbb{E}_{P^{\text{noisy}}}[\|X_j - \tilde{X}_j\|^2] + O(\mu), \quad j = 2, \dots, 3\}. \quad (54)$$

*Proof:* We analyze the distortion for the second frame. A similar argument holds for other frames.

Denote the reconstruction of the second step by  $\hat{X}_2^*$  and consider the expected distortion. From a similar justification starting from (24) and leading to (26), we can write the distortion as follows

$$\mathbb{E}[\|X_2 - \hat{X}_2^*\|^2] = \mathbb{E}[\|X_2 - \tilde{X}_2\|^2] + \mathbb{E}[\|\tilde{X}_2 - \hat{X}_2^*\|^2]. \quad (55)$$

Now, we study the expected term  $\mathbb{E}[\|\tilde{X}_2 - \hat{X}_2^*\|^2]$  as follows

$$\mathbb{E}[\|\tilde{X}_2 - \hat{X}_2^*\|^2] = \sum_{x_1} P_{\hat{X}_1^*}(x_1) \mathbb{E}[\|\tilde{X}_2 - \hat{X}_2^*\|^2 | \hat{X}_1^* = x_1]. \quad (56)$$

In order to analyze the above expression, we first approximate the MMSE reconstruction  $\tilde{X}_2$  as follows

$$\tilde{X}_2 = \mathbb{E}_{P^{\text{noisy}}}[X_2 | M_1, M_2, K] \quad (57)$$

$$= (1 - \mu)\mathbb{E}_P[X_2] + \mu\mathbb{E}_{Q^{\text{noisy}}}[X_2 | M_1, M_2, K] \quad (58)$$

$$= \mathbb{E}[X_2] + O(\mu), \quad (59)$$

where (58) follows from (53). Moreover, notice that (59) implies that

$$\mathbb{E}[\|X_2 - \tilde{X}_2\|^2] = \mathbb{E}[\|X_2 - \mathbb{E}[X_2]\|^2] + \mu(\mathbb{E}_{Q^{\text{noisy}}}[X_2 | M_1, M_2, K] - \mathbb{E}[X_2])^2 \quad (60)$$

$$= \mathbb{E}[\|X_2 - \mathbb{E}[X_2]\|^2] + O(\mu). \quad (61)$$

Next, consider the expected term in (56) as follows

$$\sum_{x_1} P_{\hat{X}_1^*}(x_1) \mathbb{E}[\|\tilde{X}_2 - \hat{X}_2^*\|^2 | \hat{X}_1^* = x_1] = \sum_{x_1} P_{\hat{X}_1^*}(x_1) \mathbb{E}[\|\mathbb{E}[X_2] - \hat{X}_2^*\|^2 | \hat{X}_1^* = x_1] + O(\mu) \quad (62)$$

$$= \sum_{x_1} P_{\hat{X}_1^*}(x_1) \mathbb{E}[\|\mathbb{E}[X_2] - X_2\|^2 | X_1 = x_1] + O(\mu) \quad (63)$$

$$= \sum_{x_1} P_{X_1}(x_1) \mathbb{E}[\|\mathbb{E}[X_2] - X_2\|^2 | X_1 = x_1] + O(\mu) \quad (64)$$

$$= \mathbb{E}[\|\mathbb{E}[X_2] - X_2\|^2] + O(\mu) \quad (65)$$

$$= \mathbb{E}[\|\tilde{X}_2 - X_2\|^2] + O(\mu), \quad (66)$$

where

- (62) follows from (59);
- (63) follows because the 0-PLF-JD implies that  $P_{\hat{X}_2^*|\hat{X}_1^*} = P_{X_2|X_1}$  and  $\mathbb{E}[X_2]$  is just a constant;
- (64) follows from 0-PLF-JD where  $P_{\hat{X}_1^*} = P_{X_1}$ ;
- (66) follows from (61).

Considering (55) and (66), we get

$$\mathbb{E}[\|X_2 - \hat{X}_2^*\|^2] = 2\mathbb{E}[\|X_2 - \tilde{X}_2\|^2] + O(\mu). \quad (67)$$

The proof for the third frame follows similar steps. ■

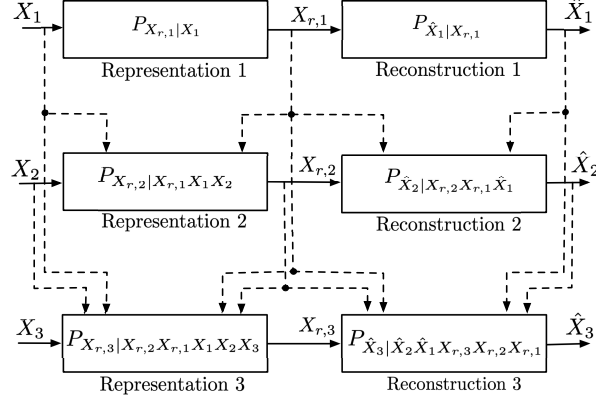

**Figure 4:** Encoded representations and reconstructions of the iRDP region  $\mathcal{C}_{\text{RDP}}$ .

## 466 D Operational RDP Region

Recall the definition of iRDP region  $\mathcal{C}_{\text{RDP}}$  for first-order Markov sources (Definition 4) as follows. It is the set of all tuples  $(R, D, P)$  satisfying

$$R_1 \geq I(X_1; X_{r,1}), \quad (68)$$

$$R_2 \geq I(X_2; X_{r,2}|X_{r,1}), \quad (69)$$

$$R_3 \geq I(X_3; X_{r,3}|X_{r,1}, X_{r,2}), \quad (70)$$

$$D_j \geq \mathbb{E}[\|X_j - \hat{X}_j\|^2], \quad j = 1, 2, 3, \quad (71)$$

$$P_j \geq \phi_j(P_{X_1 \dots X_j}, P_{\hat{X}_1 \dots \hat{X}_j}), \quad j = 1, 2, 3, \quad (72)$$

for auxiliary random variables  $(X_{r,1}, X_{r,2}, X_{r,3})$  and  $(\hat{X}_1, \hat{X}_2, \hat{X}_3)$  such that

$$\hat{X}_1 = \eta_1(X_{r,1}), \quad \hat{X}_2 = \eta_2(X_{r,1}, X_{r,2}), \quad \hat{X}_3 = X_{r,3}, \quad (73)$$

$$X_{r,1} \rightarrow X_1 \rightarrow (X_2, X_3), \quad (74)$$

$$X_{r,2} \rightarrow (X_2, X_{r,1}) \rightarrow (X_1, X_3), \quad (75)$$

$$X_{r,3} \rightarrow (X_3, X_{r,1}, X_{r,2}) \rightarrow (X_1, X_2), \quad (76)$$

467 for some deterministic functions  $\eta_1(\cdot)$  and  $\eta_2(\cdot, \cdot)$ .

**Theorem 4** For first-order Markov sources, a given  $(D, P)$  and  $R \in \mathcal{R}(D, P)$ , we have

$$R + \log(R + 1) + 5 \in \mathcal{R}^o(D, P). \quad (77)$$

Moreover, the following holds:

$$\mathcal{R}^o(D, P) \subseteq \mathcal{R}(D, P). \quad (78)$$

*Proof:* Before stating the achievable scheme, we first discuss the strong functional representation lemma [35]. It states that for jointly distributed random variables  $X$  and  $Y$ , there exists a random variable  $U$  independent of  $X$ , and function  $\phi$  such that  $Y = \phi(X, U)$ . Here,  $U$  is not necessarily unique. The strong functional representation lemma states further that there exists a  $U$  which has information of  $Y$  in the sense that

$$H(Y|U) \leq I(X; Y) + \log(I(X; Y) + 1) + 4. \quad (79)$$

Notice that the strong functional representation lemma can be applied conditionally. Given  $P_{XY|W}$ , we can represent  $Y$  as a function of  $(X, W, U)$  such that  $U$  is independent of  $(X, W)$  and

$$H(Y|W, U) \leq I(X; Y|W) + \log(I(X; Y|W) + 1) + 4. \quad (80)$$

468 *Proof of (77) (Inner bound):*

For a given  $(D, P)$  and  $R \in \mathcal{R}(D, P)$ , let  $X_r = (X_{r,1}, X_{r,2}, X_{r,3})$  be jointly distributed with  $X = (X_1, X_2, X_3)$  where the Markov chains (74)–(76) hold and the rate constraints in (68)–(70)

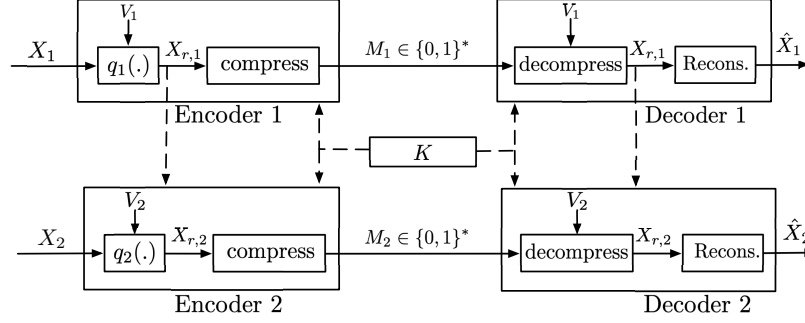

**Figure 5:** Strong functional representation lemma for  $T = 2$  frames.

are satisfied such that there exist  $(\hat{X}_1, \hat{X}_2, \hat{X}_3)$  for which distortion-perception constraints (71)–(72) hold. Denote the joint distribution of  $(X, X_r, \hat{X})$  by  $P_{XX_r\hat{X}}$  and notice that according to the Markov chains in (74)–(76), it factorizes as the following

$$P_{XX_r\hat{X}} = P_{X_1X_2X_3} \cdot P_{X_{r,1}|X_1} \cdot P_{X_{r,2}|X_{r,1}X_2} \cdot P_{X_{r,3}|X_{r,2}X_{r,1}X_3} \cdot \mathbb{1}\{\hat{X}_1 = g_1(X_{r,1})\} \cdot \mathbb{1}\{\hat{X}_2 = g_2(X_{r,1}, X_{r,3})\} \cdot \mathbb{1}\{\hat{X}_3 = X_{r,3}\}. \quad (81)$$

For an illustration of encoded representations  $X_r$  and reconstructions  $\hat{X}$  in  $\mathcal{R}(\mathcal{D}, \mathcal{P})$  which are induced by distribution  $P_{XX_r\hat{X}}$ , see Fig. 4.

Now, we show that  $R + \log(R + 1) + 5 \in \mathcal{R}(\mathcal{D}, \mathcal{P})$ . The achievable scheme is as follows. Fix the joint distribution  $P_{X_r}$  according to (81) which constructs the codebook, given by

$$P_{X_r} = P_{X_{r,1}} P_{X_{r,2}|X_{r,1}} P_{X_{r,3}|X_{r,2}X_{r,1}}. \quad (82)$$

From the strong functional representation lemma [35], we know that

- there exist a random variable  $V_1$  independent of  $X_1$  and a deterministic function  $q_1$  such that  $X_{r,1} = q_1(X_1, V_1)$  and

$$H(X_{r,1}|V_1) \leq I(X_1; X_{r,1}) + \log(I(X_1; X_{r,1}) + 1) + 4, \quad (83)$$

which means that the first encoder observes the source  $X_1$  and applies the function  $q_1$  to get  $X_{r,1}$  whose distribution needs to be preserved according to (82) (see Fig. 5);

- according to the conditional strong functional representation lemma, there exist a random variable  $V_2$  independent of  $(X_2, X_{r,1})$  and a deterministic function  $q_2$  such that  $X_{r,2} = q_2(X_{r,1}, X_2, V_2)$  and

$$H(X_{r,2}|X_{r,1}, V_2) \leq I(X_2; X_{r,2}|X_{r,1}) + \log(I(X_2; X_{r,2}|X_{r,1}) + 1) + 4. \quad (84)$$

At the second step, the representation  $X_{r,1}$  is available at the second encoder. So, upon observing the source  $X_2$ , it applies the function  $q_2$  to get  $X_{r,2}$  whose conditional distribution given  $X_{r,1}$  needs to be preserved according to (82) (see Fig. 5);

- according to the conditional strong functional representation lemma, there exist a random variable  $V_3$  independent of  $(X_3, X_{r,1}, X_{r,2})$  and a deterministic function  $q_3$  such that  $X_{r,3} = q_3(X_{r,1}, X_{r,2}, X_3, V_3)$  and

$$H(X_{r,3}|X_{r,1}, X_{r,2}, V_3) \leq I(X_3; X_{r,3}|X_{r,1}, X_{r,2}) + \log(I(X_3; X_{r,3}|X_{r,1}, X_{r,2}) + 1) + 4. \quad (85)$$

Now, the encoding and decoding are as follows

- With  $V_1$  available at all encoders and decoders, we can have a class of prefix-free binary codes indexed by  $V_1$  with the expected codeword length not larger than  $I(X_1; X_{r,1}) + \log(I(X_1; X_{r,1}) + 1) + 5$  to represent  $X_{r,1}$ , losslessly (see Fig. 5).
- With  $V_2$  available at the encoders and decoders, we can design a set of prefix-free binary codes indexed by  $(V_2, X_{r,1})$  with expected codeword length not larger than  $I(X_2; X_{r,2}|X_{r,1}) + \log(I(X_2; X_{r,2}|X_{r,1}) + 1) + 5$  to represent  $X_{r,2}$ , losslessly (see Fig. 5).

- 484 • Similarly, one can represent  $X_{r,3}$  losslessly with  $V_3$  available at the third encoder and  
485 decoder.
- 486 • The decoders can use functions  $\hat{X}_1 = \eta_1(X_{r,1})$ ,  $\hat{X}_2 = \eta_2(X_{r,1}, X_{r,2})$  and  $\hat{X}_3 = X_{r,3}$  to  
487 get the reconstruction  $\hat{X}$ .

488 This shows that  $R + \log(R + 1) + 5 \in \mathcal{R}^o(D, P)$ .

489 *Proof of (78) (Outer Bound):*

For any  $(D, P)$ ,  $R \in \mathcal{R}^o(D, P)$ , shared randomness  $K$ , encoding functions  $f_j: \mathcal{X}_1 \times \dots \times \mathcal{X}_j \times \mathcal{K} \rightarrow \mathcal{M}_j$  and decoding functions  $g_j: \mathcal{M}_1 \times \mathcal{M}_2 \times \dots \times \mathcal{M}_j \times \mathcal{K} \rightarrow \hat{\mathcal{X}}_j$  such that

$$R_j \geq \mathbb{E}[\ell(M_j)], \quad j = 1, 2, 3, \quad (86)$$

and

$$D_j \geq \mathbb{E}[\|X_j - \hat{X}_j\|^2], \quad j = 1, 2, 3, \quad (87)$$

$$P_j \geq \phi_j(P_{X_1 \dots X_j}, P_{\hat{X}_1 \dots \hat{X}_j}), \quad j = 1, 2, 3, \quad (88)$$

we lower bound the expected length of the messages. Define

$$X_{r,1} := (M_1, K), \quad (89)$$

$$X_{r,2} := (M_1, M_2, K), \quad (90)$$

and recall that according to the decoding functions, we have

$$\hat{X}_j = g_j(M_1, \dots, M_j, K), \quad j = 1, 2, 3. \quad (91)$$

We can write

$$R_1 \geq \mathbb{E}[\ell(M_1)] \geq H(M_1|K) \quad (92)$$

$$= I(X_1; M_1|K) \quad (93)$$

$$= I(X_1; M_1, K) \quad (94)$$

$$= I(X_1; X_{r,1}). \quad (95)$$

Now, consider the following set of inequalities

$$R_2 \geq \mathbb{E}[\ell(M_2)] \geq H(M_2|M_1, K) \quad (96)$$

$$= I(X_1, X_2; M_2|M_1, K) \quad (97)$$

$$= I(X_1, X_2; X_{r,2}|X_{r,1}). \quad (98)$$

Similarly, we have

$$R_3 \geq \mathbb{E}[\ell(M_3)] \geq H(M_3|M_1, M_2, K) \quad (99)$$

$$= I(X_1, X_2, X_3; M_3|M_1, M_2, K) \quad (100)$$

$$\geq I(X_1, X_2, X_3; \hat{X}_3|X_{r,1}, X_{r,2}). \quad (101)$$

Notice that the definitions in (89)–(90) imply the following Markov chains

$$X_{r,1} \rightarrow X_1 \rightarrow (X_2, X_3), \quad (102)$$

$$X_{r,2} \rightarrow (X_1, X_2, X_{r,1}) \rightarrow X_3. \quad (103)$$

On the other hand, the decoding functions of the first and second steps imply that

$$\hat{X}_1 = g_1(M_1, K), \quad (104)$$

$$\hat{X}_2 = g_2(M_1, M_2, K), \quad (105)$$

where together with definitions in (89) and (90), we can write

$$\hat{X}_1 = g_1(M_1, K) := \eta_1(X_{r,1}), \quad (106)$$

$$\hat{X}_2 = g_2(M_1, M_2, K) := \eta_2(X_{r,1}, X_{r,2}), \quad (107)$$

490 such that  $\eta_1(\cdot)$  and  $\eta_2(\cdot, \cdot)$  are deterministic functions.

Now, consider the fact that the set of constraints in (87)–(88), (95), (98), (101) with Markov chains in (102)–(103) and deterministic functions in (106)–(107) constitute an iRDP region, denoted by  $\bar{\mathcal{C}}_{\text{RDP}}$ , which is the set of all tuples  $(R, D, P)$  such that

$$R_1 \geq I(X_1; X_{r,1}), \quad (108)$$

$$R_2 \geq I(X_1, X_2; X_{r,2}|X_{r,1}), \quad (109)$$

$$R_3 \geq I(X_1, X_2, X_3; \hat{X}_3|X_{r,1}, X_{r,2}), \quad (110)$$

$$D_j \geq \mathbb{E}[\|X_j - \hat{X}_j\|^2], \quad j = 1, 2, 3, \quad (111)$$

$$P_j \geq \phi_j(P_{X_1 \dots X_j}, P_{\hat{X}_1 \dots \hat{X}_j}), \quad j = 1, 2, 3, \quad (112)$$

for auxiliary random variables  $(X_{r,1}, X_{r,2})$  and  $(\hat{X}_1, \hat{X}_2, \hat{X}_3)$  satisfying the following

$$\hat{X}_1 = \eta_1(X_{r,1}), \quad \hat{X}_2 = \eta_2(X_{r,1}, X_{r,2}) \quad (113)$$

$$X_{r,1} \rightarrow X_1 \rightarrow (X_2, X_3), \quad (114)$$

$$X_{r,2} \rightarrow (X_1, X_2, X_{r,1}) \rightarrow X_3. \quad (115)$$

for some deterministic functions  $\eta_1(\cdot)$  and  $\eta_2(\cdot, \cdot)$ .

Comparing the two regions  $\bar{\mathcal{C}}_{\text{RDP}}$  and  $\mathcal{C}_{\text{RDP}}$ , we identify the following differences. The Markov chain in (74) is more restricted comparing to (115). Moreover, the Markov chain (75) does not exist in  $\bar{\mathcal{C}}_{\text{RDP}}$ . The following lemma states that  $\bar{\mathcal{C}}_{\text{RDP}} = \mathcal{C}_{\text{RDP}}$ . Now, for a given  $(D, P)$ , let  $\bar{\mathcal{R}}(D, P)$  denote the set of rate tuples  $R$  such  $(R, D, P) \in \bar{\mathcal{C}}_{\text{RDP}}$ , then this lemma implies that  $\bar{\mathcal{R}}(D, P) = \mathcal{R}(D, P)$  which completes the proof of the outer bound. Moreover, notice that the above proof only deals with the statistics of the representations and reconstructions and does not depend on the choice of the PLF. So, it holds for both PLF-FMD and PLF-JD. This concludes the proof.

We conclude this section by the following lemma.

**Lemma 1** *For first-order Markov sources, we have*

$$\mathcal{C}_{\text{RDP}} = \bar{\mathcal{C}}_{\text{RDP}}. \quad (116)$$

*Proof:* This result for the scenario without perception constraint has been similarly observed in [36, Eq. (12)]. The proof in this section is provided for completeness.

First, notice that the set of Markov chains in (74)–(76) is more restricted than the ones in (114)–(115), hence  $\mathcal{C}_{\text{RDP}} \subseteq \bar{\mathcal{C}}_{\text{RDP}}$ . Now, it remains to prove that  $\bar{\mathcal{C}}_{\text{RDP}} \subseteq \mathcal{C}_{\text{RDP}}$ . Consider the following facts

1. The distortion constraints in (111) depend only on the joint distribution of  $(X_j, \hat{X}_j)$ , and thus on the joint distribution of  $(X_j, X_{r,1}, \dots, X_{r,j})$ . So, imposing the Markov chain  $X_{r,2} \rightarrow (X_2, X_{r,1}) \rightarrow X_1$  does not affect the expected distortion  $\mathbb{E}[\|X_2 - \hat{X}_2\|^2]$  since it does not depend on the joint distribution of  $X_1$  with  $(X_{r,1}, X_{r,2}, X_2)$ . A similar argument holds for other frames;
2. The perception constraints in (112) depend on the joint distributions  $P_{X_1 \dots X_j}$  and  $P_{\hat{X}_1, \dots, \hat{X}_j}$  (hence on  $P_{X_{r,1} \dots X_{r,j}}$ ). Thus, imposing  $X_{r,2} \rightarrow (X_2, X_{r,1}) \rightarrow X_1$  does not affect  $\phi_2(P_{X_1 X_2}, P_{\hat{X}_1 \hat{X}_2})$  since it does not depend on the joint distribution of  $X_1$  with  $(X_{r,1}, X_{r,2}, X_2)$ . A similar argument holds for other frames;
3. Moreover, the rate constraints in (109) and (110) would be further lower bounded by

$$R_2 \geq I(X_1, X_2; X_{r,2}|X_{r,1}) \geq I(X_2; X_{r,2}|X_{r,1}), \quad (117)$$

$$R_3 \geq I(X_1, X_2, X_3; \hat{X}_3|X_{r,1}, X_{r,2}) \geq I(X_3; \hat{X}_3|X_{r,1}, X_{r,2}). \quad (118)$$

Thus, the set of rate constraints is optimized by the set of Markov chains (74)–(76).

4. The mutual information terms  $I(X_1; X_{r,1})$ ,  $I(X_2; X_{r,2}|X_{r,1})$  and  $I(X_3; \hat{X}_3|X_{r,1}, X_{r,2})$  depend on distributions  $P_{X_1 X_{r,1}}$ ,  $P_{X_{r,1} X_{r,2} X_2}$  and  $P_{X_3 \hat{X}_3 X_{r,1} X_{r,2}}$ , respectively. So, these distributions should be preserved by the set of Markov chains. The first two distributions are preserved by the choice of (73)–(74). Now, since we have first-order Markov sources (see Definition 3), preserving the joint distributions of  $P_{X_{r,1} X_1}$  and  $P_{X_{r,1} X_{r,2} X_2}$  is sufficient to preserve the distribution  $P_{X_{r,1} X_{r,2} X_3}$ . So, preserving the joint distribution of  $P_{\hat{X}_3 X_{r,1} X_{r,2}}$  is sufficient to keep  $I(X_3; \hat{X}_3|X_{r,1}, X_{r,2})$  unchanged.

Considering the above four facts, without loss of optimality, one can impose the following Markov chains

$$X_{r,1} \rightarrow X_1 \rightarrow (X_2, X_3), \quad (119)$$

$$X_{r,2} \rightarrow (X_2, X_{r,1}) \rightarrow (X_1, X_3), \quad (120)$$

$$\hat{X}_3 \rightarrow (X_3, X_{r,1}, X_{r,2}) \rightarrow (X_1, X_2). \quad (121)$$

521 This concludes the proof for the PLF-JD. For the PLF-FMD, notice that the only difference is the  
 522 second fact stated above. But, this also holds since the perception constraints depend only on  $P_{X_j}$   
 523 and  $P_{\hat{X}_j}$  (hence on  $P_{X_{r,1}, \dots, X_{r,j}}$ ). ■

524 ■

## 525 E Gauss-Markov Source Model

526 We first remark that the Wasserstein-2 distance can also be replaced by the KL-divergence in most of  
 527 the following analysis. The common properties between these two measures are convexity and the  
 528 fact that they both depend on only second-order statistics when restricted to Gaussian source model.

529 **Theorem 5** *For the Gauss-Markov source model, any tuple  $(R, D, P) \in \mathcal{C}_{\text{RDP}}$  can be attained by a*  
 530 *jointly Gaussian distribution over  $(X_{r,1}, X_{r,2}, X_{r,3})$  and identity mappings for  $\eta_j(\cdot)$  in Definition 4*

531 *Proof:* First, notice that a proof for the setting without perception constraint is provided in [37]. The  
 532 following proof is different from [37] in some steps and also involves the perception constraint.

For a given tuple  $(R, D, P) \in \mathcal{C}_{\text{RDP}}$ , let  $X_{r,1}^*, X_{r,2}^*, \hat{X}_1^* = \eta_1(X_{r,1}^*)$ ,  $\hat{X}_2^* = \eta_2(X_{r,1}^*, X_{r,2}^*)$  and  $\hat{X}_3^*$   
 be random variables satisfying (73)–(75). Let  $P_{\hat{X}_1^G|X_1}$ ,  $P_{\hat{X}_2^G|\hat{X}_1^G X_2}$  and  $P_{\hat{X}_3^G|\hat{X}_1^G \hat{X}_2^G X_3}$  be jointly  
 Gaussian distributions such that the following conditions are satisfied.

$$\text{cov}(\hat{X}_1^G, X_1) = \text{cov}(\hat{X}_1^*, X_1), \quad (122)$$

$$\text{cov}(\hat{X}_1^G, \hat{X}_2^G, X_2) = \text{cov}(\hat{X}_1^*, \hat{X}_2^*, X_2), \quad (123)$$

$$\text{cov}(\hat{X}_1^G, \hat{X}_2^G, \hat{X}_3^G, X_3) = \text{cov}(\hat{X}_1^*, \hat{X}_2^*, \hat{X}_3^*, X_3), \quad (124)$$

In general, the Gaussian random variables which satisfy the constraints in (122)–(124) can be written  
 in the following format

$$X_1 = \nu \hat{X}_1^G + Z_1, \quad (125)$$

$$\hat{X}_2^G = \omega_1 \hat{X}_1^G + \omega_2 X_2 + Z_2, \quad (126)$$

$$\hat{X}_3^G = \tau_1 \hat{X}_1^G + \tau_2 \hat{X}_2^G + \tau_3 X_3 + Z_3, \quad (127)$$

533 for some real  $\nu, \omega_1, \omega_2, \tau_1, \tau_2, \tau_3$  where  $\hat{X}_1^G \sim \mathcal{N}(0, \sigma_{\hat{X}_1^G}^2)$ ,  $\hat{X}_2^G \sim \mathcal{N}(0, \sigma_{\hat{X}_2^G}^2)$ ,  $Z_1, Z_2$  and  $Z_3$  are  
 534 Gaussian random variables with zero mean and variances  $\alpha_1^2, \alpha_2^2, \alpha_3^2$ , independent of  $\hat{X}_1^G$ ,  $(\hat{X}_1^G, X_2)$   
 535 and  $(\hat{X}_1^G, \hat{X}_2^G, X_3)$ , respectively.

We explicitly derive the coefficients  $\nu, \omega_1, \omega_2, \tau_1, \tau_2$  and  $\tau_3$  in the following. Multiplying both sides  
 of (125) by  $\hat{X}_1^G$  and taking an expectation, we get

$$\mathbb{E}[X_1 \hat{X}_1^G] = \nu \sigma_{\hat{X}_1^G}^2. \quad (128)$$

According to (122), the above equation can be written as follows

$$\mathbb{E}[X_1 \hat{X}_1^*] = \nu \mathbb{E}[\hat{X}_1^{*2}]. \quad (129)$$

Multiplying both sides of (126) by the vector  $[\hat{X}_1^G \ X_2]$  and taking an expectation, we have

$$\begin{bmatrix} \mathbb{E}[\hat{X}_1^G \hat{X}_2^G] & \mathbb{E}[X_2 \hat{X}_2^G] \end{bmatrix} = [\omega_1 \ \omega_2] \begin{pmatrix} \sigma_{\hat{X}_1^G}^2 & \mathbb{E}[X_2 \hat{X}_1^G] \\ \mathbb{E}[X_2 \hat{X}_1^G] & \sigma_2^2 \end{pmatrix} \quad (130)$$

Considering the fact that  $\mathbb{E}[X_2 \hat{X}_1^G] = \rho_1 \mathbb{E}[X_1 \hat{X}_1^G]$  and according to (123), the above equation can  
 be written as follows

$$\begin{bmatrix} \mathbb{E}[\hat{X}_1^* \hat{X}_2^*] & \mathbb{E}[X_2 \hat{X}_2^*] \end{bmatrix} = [\omega_1 \ \omega_2] \begin{pmatrix} \mathbb{E}[\hat{X}_1^{*2}] & \rho_1 \mathbb{E}[X_1 \hat{X}_1^*] \\ \rho_1 \mathbb{E}[X_1 \hat{X}_1^*] & \sigma_2^2 \end{pmatrix}. \quad (131)$$

Similarly, multiplying both sides of (127) by the vector  $[\hat{X}_1^G \ \hat{X}_2^G \ X_3]$ , taking an expectation and considering (124), we get

$$[\mathbb{E}[\hat{X}_1^* \hat{X}_3^*] \ \mathbb{E}[\hat{X}_2^* \hat{X}_3^*] \ \mathbb{E}[X_3 \hat{X}_3^*]] = [\tau_1 \ \tau_2 \ \tau_3] \begin{pmatrix} \mathbb{E}[\hat{X}_1^{*2}] & \mathbb{E}[\hat{X}_1^* \hat{X}_2^*] & \rho_1 \rho_2 \mathbb{E}[X_1 \hat{X}_1^*] \\ \mathbb{E}[\hat{X}_1^* \hat{X}_2^*] & \mathbb{E}[\hat{X}_2^{*2}] & \rho_2 \mathbb{E}[X_2 \hat{X}_2^*] \\ \rho_1 \rho_2 \mathbb{E}[X_1 \hat{X}_1^*] & \rho_2 \mathbb{E}[X_2 \hat{X}_2^*] & \mathbb{E}[\hat{X}_3^{*2}] \end{pmatrix}. \quad (132)$$

Solving equations (129), (131) and (132), we get

$$\sigma_{\hat{X}_1^G}^2 = \mathbb{E}[\hat{X}_1^{*2}], \quad (133)$$

$$\nu = \frac{\mathbb{E}[X_1 \hat{X}_1^*]}{\mathbb{E}[\hat{X}_1^{*2}]}, \quad (134)$$

$$\alpha_1^2 = \sigma_1^2 - \frac{\mathbb{E}[X_1 \hat{X}_1^*]}{\mathbb{E}[\hat{X}_1^{*2}]}, \quad (135)$$

$$\omega_1 = \frac{\nu \rho_1 \mathbb{E}[\hat{X}_1^* \hat{X}_2^*] - \mathbb{E}[X_2 \hat{X}_2^*]}{\nu^2 \rho_1^2 \sigma_{\hat{X}_1^G}^2 - \sigma_2^2}, \quad (136)$$

$$\omega_2 = \frac{\nu \rho_1 \sigma_{\hat{X}_1^G}^2 \mathbb{E}[X_2 \hat{X}_2^*] - \sigma_2^2 \mathbb{E}[\hat{X}_1^* \hat{X}_2^*]}{\nu^2 \rho_1^2 \sigma_{\hat{X}_1^G}^4 - \sigma_2^2 \sigma_{\hat{X}_1^G}^2}, \quad (137)$$

$$\alpha_2^2 = \mathbb{E}[\hat{X}_2^{*2}] - \alpha_2^2 \sigma_{\hat{X}_1^G}^2 - \omega_2^2 \sigma_2^2 - 2\omega_1 \omega_2 \rho_1 \nu \sigma_{\hat{X}_1^G}^2. \quad (138)$$

For the third step, the coefficients and noise variance of (127) are given as follows

$$\begin{aligned} & [\tau_1 \ \tau_2 \ \tau_3] \\ &= [\mathbb{E}[\hat{X}_1^* \hat{X}_3^*] \ \mathbb{E}[\hat{X}_2^* \hat{X}_3^*] \ \mathbb{E}[X_3 \hat{X}_3^*]] \begin{pmatrix} \mathbb{E}[\hat{X}_1^{*2}] & \mathbb{E}[\hat{X}_1^* \hat{X}_2^*] & \rho_1 \rho_2 \mathbb{E}[X_1 \hat{X}_1^*] \\ \mathbb{E}[\hat{X}_1^* \hat{X}_2^*] & \mathbb{E}[\hat{X}_2^{*2}] & \rho_2 \mathbb{E}[X_2 \hat{X}_2^*] \\ \rho_1 \rho_2 \mathbb{E}[X_1 \hat{X}_1^*] & \rho_2 \mathbb{E}[X_2 \hat{X}_2^*] & \mathbb{E}[\hat{X}_3^{*2}] \end{pmatrix}^{-1}, \end{aligned} \quad (139)$$

$$\begin{aligned} \alpha_3^2 &= \mathbb{E}[\hat{X}_3^{*2}] - \tau_1^2 \mathbb{E}[\hat{X}_1^{*2}] - \tau_2^2 \mathbb{E}[\hat{X}_2^{*2}] - \tau_3^2 \mathbb{E}[X_3^2] \\ &\quad - 2\tau_1 \tau_2 \mathbb{E}[\hat{X}_1^* \hat{X}_2^*] - 2\tau_1 \tau_3 \rho_1 \rho_2 \mathbb{E}[X_1 \hat{X}_1^*] - 2\tau_2 \tau_3 \rho_2 \mathbb{E}[X_2 \hat{X}_2^*], \end{aligned} \quad (140)$$

536 where  $(\cdot)^{-1}$  denotes the inverse of a matrix.

537 Now, we look at the rate constraints.

538 Rate Constraints:

Consider the rate constraint of the first step as follows

$$R_1 \geq I(X_1; X_{r,1}^*) \quad (141)$$

$$= H(X_1) - H(X_1 | X_{r,1}^*) \quad (142)$$

$$\geq H(X_1) - H(X_1 | \hat{X}_1^*) \quad (143)$$

$$= H(X_1) - H(X_1 - \mathbb{E}[X_1 | \hat{X}_1^*] | \hat{X}_1^*) \quad (144)$$

$$\geq H(X_1) - H(X_1 - \mathbb{E}[X_1 | \hat{X}_1^*]) \quad (145)$$

$$\geq H(X_1) - H(X_1 - \mathbb{E}[X_1 | \hat{X}_1^G]) \quad (146)$$

$$= H(X_1) - H(X_1 - \mathbb{E}[X_1 | \hat{X}_1^G] | \hat{X}_1^G) \quad (147)$$

$$= I(X_1; \hat{X}_1^G) \quad (148)$$

539 where

- 540 • (143) follows because  $\hat{X}_1^*$  is a function of  $X_{r,1}^*$ ;
- 541 • (146) follows because for a given covariance matrix in (122), the Gaussian distribution maximizes the differential entropy;
- 543 • (147) follows because the MMSE is uncorrelated from the data and since the random variables are Gaussian, the MMSE would be independent of the data.

Next, consider the rate constraint of the second step as the following

$$R_2 \geq I(X_2; X_{r,2}^* | X_{r,1}^*) \quad (149)$$

$$= H(X_2 | X_{r,1}^*) - H(X_2 | X_{r,1}^*, X_{r,2}^*) \quad (150)$$

$$\geq H(X_2 | X_{r,1}^*) - H(X_2 | \hat{X}_1^*, \hat{X}_2^*) \quad (151)$$

$$\geq H(X_2 | X_{r,1}^*) - H(X_2 | \hat{X}_1^G, \hat{X}_2^G) \quad (152)$$

$$= H(\rho_1 X_1 + N_1 | X_{r,1}^*) - H(X_2 | \hat{X}_1^G, \hat{X}_2^G) \quad (153)$$

$$\geq \frac{1}{2} \log \left( \rho_1^2 2^{2H(X_1 | X_{r,1}^*)} + 2^{2H(N_1)} \right) - H(X_2 | \hat{X}_1^G, \hat{X}_2^G) \quad (154)$$

$$\geq \frac{1}{2} \log \left( \rho_1^2 2^{-2R_1} 2^{2H(X_1)} + 2^{2H(N_1)} \right) - H(X_2 | \hat{X}_1^G, \hat{X}_2^G), \quad (155)$$

where

- (151) follows because  $\hat{X}_1^*$  and  $\hat{X}_2^*$  are deterministic functions of  $X_{r,1}^*$  and  $(X_{r,1}^*, X_{r,2}^*)$ , respectively;
- (152) follows because for a given covariance matrix in (123), the Gaussian distribution maximizes the differential entropy;
- (154) follows from entropy power inequality (EPI) [38, pp. 22];
- (155) follows from (142).

Similarly, consider the rate constraint of the third frame as the following,

$$R_3 \geq I(X_3; \hat{X}_3^* | X_{r,1}^*, X_{r,2}^*) \quad (156)$$

$$= H(X_3 | X_{r,1}^*, X_{r,2}^*) - H(X_3 | X_{r,1}^*, X_{r,2}^*, \hat{X}_3^*) \quad (157)$$

$$\geq H(X_3 | X_{r,1}^*, X_{r,2}^*) - H(X_3 | \hat{X}_1^*, \hat{X}_2^*, \hat{X}_3^*) \quad (158)$$

$$\geq H(X_3 | X_{r,1}^*, X_{r,2}^*) - H(X_3 | \hat{X}_1^G, \hat{X}_2^G, \hat{X}_3^G) \quad (159)$$

$$= H(\rho_2 X_2 + N_2 | X_{r,1}^*, X_{r,2}^*) - H(X_3 | \hat{X}_1^G, \hat{X}_2^G, \hat{X}_3^G) \quad (160)$$

$$\geq \frac{1}{2} \log \left( \rho_2^2 2^{2H(X_2 | X_{r,1}^*, X_{r,2}^*)} + 2^{2H(N_2)} \right) - H(X_3 | \hat{X}_1^G, \hat{X}_2^G, \hat{X}_3^G) \quad (161)$$

$$\geq \frac{1}{2} \log \left( \rho_2^2 2^{-2R_2} 2^{2H(X_2 | X_{r,1}^*)} + 2^{2H(N_2)} \right) - H(X_3 | \hat{X}_1^G, \hat{X}_2^G, \hat{X}_3^G) \quad (162)$$

$$\geq \frac{1}{2} \log \left( \rho_1^2 \rho_2^2 2^{-2R_1-2R_2} 2^{2H(X_1)} + \rho_2^2 2^{-2R_2} 2^{2H(N_1)} + 2^{2H(N_2)} \right) - H(X_3 | \hat{X}_1^G, \hat{X}_2^G, \hat{X}_3^G) \quad (163)$$

Next, we look at the distortion constraint.

Distortion Constraint: The choices in (122)–(124) imply that

$$D_j \geq \mathbb{E}[\|X_j - \hat{X}_j^*\|^2] = \mathbb{E}[\|X_j - \hat{X}_j^G\|^2], \quad j = 1, 2, 3. \quad (164)$$

Finally, we look at the perception constraint

Perception Constraint:

Define the following distribution

$$P_{U^*V^*} := \arg \inf_{\substack{\hat{P}_{UV}: \\ \hat{P}_U = P_{X_1} \\ \hat{P}_V = P_{\hat{X}_1^*}}} \mathbb{E}_{\hat{P}}[\|U - V\|^2]. \quad (165)$$

Now, define  $P_{UGVG}$  to be a Gaussian joint distribution with the following covariance matrix

$$\text{cov}(U^G, V^G) = \text{cov}(U^*, V^*). \quad (166)$$

Then, we have the following set of inequalities:

$$P_1 \geq W_2^2(P_{X_1}, P_{\hat{X}_1^*}) = \inf_{\substack{\hat{P}_{UV}: \\ \hat{P}_U = P_{X_1} \\ \hat{P}_V = P_{\hat{X}_1^*}}} \mathbb{E}_{\hat{P}}[\|U - V\|^2] \quad (167)$$

$$= \mathbb{E}[\|U^* - V^*\|^2] \quad (168)$$

$$= \mathbb{E}[\|U^G - V^G\|^2] \quad (169)$$

$$\geq W_2^2(P_{U^G}, P_{V^G}) \quad (170)$$

$$= \inf_{\substack{\hat{P}_{UV}: \\ \hat{P}_U = P_{U^G} \\ \hat{P}_V = P_{V^G}}} \mathbb{E}_{\hat{P}}[\|U - V\|^2] \quad (171)$$

$$= \inf_{\substack{\hat{P}_{UV}: \\ \hat{P}_U = P_{X_1} \\ \hat{P}_V = P_{\hat{X}_1^G}}} \mathbb{E}_{\hat{P}}[\|U - V\|^2] \quad (172)$$

$$= W_2^2(P_{X_1}, P_{\hat{X}_1^G}), \quad (173)$$

556 where

- 557 • (168) follows from the definition in (165);
- 558 • (169) follows from (166) which implies that  $(U^*, V^*)$  and  $(U^G, V^G)$  have the same second-order statistics;
- 559 • (172) follows because  $P_{V^G} = P_{\hat{X}_1^G}$  which is justified in the following. First, notice that
- 560 both  $P_{V^G}$  and  $P_{\hat{X}_1^G}$  are Gaussian distributions. Denote the variance of  $V^G$  by  $\sigma_{V^G}^2$  and
- 561 recall that the variance of  $\hat{X}_1^G$  is denoted by  $\sigma_{\hat{X}_1^G}^2$ . According to (166),  $\sigma_{V^G}^2$  is equal to the
- 562 variance of  $V^*$ . Also, from (165), we know that  $P_{V^*} = P_{\hat{X}_1^*}$ , hence the variances of  $V^*$
- 563 and  $\hat{X}_1^*$  are the same. On the other side, according to (122), we know that the variance of
- 564  $\hat{X}_1^*$  is equal to  $\sigma_{\hat{X}_1^G}^2$ . Thus, we conclude that  $\sigma_{\hat{X}_1^G}^2 = \sigma_{V^G}^2$ , which yields  $P_{V^G} = P_{\hat{X}_1^G}$ . A
- 565 similar argument shows that  $P_{U^G} = P_{X_1}$ .

567 A similar argument holds for the perception constraint of the second and third steps for both PLFs.

Thus, we have proved the set of Gaussian auxiliary random variables  $(\hat{X}_1^G, \hat{X}_2^G, \hat{X}_3^G)$  given in (125)–(127) where the coefficients are chosen according to distortion-perception constraints, provides an outer bound to  $\mathcal{C}_{\text{RDP}}$  which is the set of all tuples  $(R, D, P)$  such that

$$R_1 \geq I(X_1; \hat{X}_1^G), \quad (174)$$

$$R_2 \geq \frac{1}{2} \log \left( \rho_1^2 2^{-2R_1} 2^{2H(X_1)} + 2^{2H(N_1)} \right) - H(X_2 | \hat{X}_1^G, \hat{X}_2^G), \quad (175)$$

$$R_3 \geq \frac{1}{2} \log \left( \rho_1^2 \rho_2^2 2^{-2R_1-2R_2} 2^{2H(X_1)} + \rho_2^2 2^{-2R_2} 2^{2H(N_1)} + 2^{2H(N_2)} \right) - H(X_3 | \hat{X}_1^G, \hat{X}_2^G, \hat{X}_3^G), \quad (176)$$

$$D_j \geq \mathbb{E}[\|X_j - \hat{X}_j^G\|^2], \quad j = 1, 2, 3 \quad (177)$$

$$P_j \geq W_2^2(P_{X_1 \dots X_j}, P_{\hat{X}_1^G \dots \hat{X}_j^G}). \quad (178)$$

Now, we need to show that the above RDP region is also an inner bound to  $\mathcal{C}_{\text{RDP}}$ . This is simply verified by the following choice. In iRDP region of (68)–(76), choose the following:

$$X_{r,j} = \hat{X}_j = \hat{X}_j^G, \quad j = 1, 2, 3, \quad (179)$$

where  $(\hat{X}_1^G, \hat{X}_2^G, \hat{X}_3^G)$  satisfy (125)–(127) with coefficients chosen according to distortion-perception constraints. The lower bounds on distortion and perception constraints in (177) and (178) are immediately achieved by this choice. Now, we will look at the rate constraints. The achievable rate constraint of the first step can be written as follows

$$R_1 \geq I(X_1; \hat{X}_1^G), \quad (180)$$

which immediately coincides with (174). The achievable rate of the second step can be written as follows

$$R_2 \geq I(X_2; \hat{X}_2^G | \hat{X}_1^G) \quad (181)$$

$$= H(X_2 | \hat{X}_1^G) - H(X_2 | \hat{X}_1^G, \hat{X}_2^G) \quad (182)$$

$$= H(\rho_1 X_1 + N_1 | \hat{X}_1^G) - H(X_2 | \hat{X}_1^G, \hat{X}_2^G) \quad (183)$$

$$= \frac{1}{2} \log(\rho_1^2 2^{2H(X_1 | \hat{X}_1^G)} + 2^{2H(N_1)}) - H(X_2 | \hat{X}_1^G, \hat{X}_2^G) \quad (184)$$

$$\geq \frac{1}{2} \log(\rho_1^2 2^{-2R_1} 2^{2H(X_1)} + 2^{2H(N_1)}) - H(X_2 | \hat{X}_1^G, \hat{X}_2^G), \quad (185)$$

where

- (184) follows because EPI holds with “equality” for jointly Gaussian distributions [38, pp. 22];
- (185) follows from (175).

Thus, the bound in (185) coincides with (155). A similar argument holds for the achievable rate of the third frame.

Notice that the above proof (both converse and achievability) can be extended to  $T$  frames using the sequential analysis that was presented. Thus, without loss of optimality, one can restrict to the jointly Gaussian distributions and identity functions  $\eta_1(\cdot)$  and  $\eta_2(\cdot, \cdot)$  in iRDP region  $\mathcal{C}_{\text{RDP}}$ . ■

For a given rate  $R$ , the following corollary provides the optimization programs which lead to the characterization of the DP tradeoff  $\mathcal{DP}(R)$  for the Gauss-Markov source model.

**Corollary 1** *For a given rate tuple  $R$  and  $T = 2$  frames, the optimal reconstructions of the DP-tradeoff  $\mathcal{DP}(R)$  can be written as follows*

$$\hat{X}_1^G = \nu X_1 + Z_1, \quad (186)$$

$$\hat{X}_2^G = \omega_1 \hat{X}_1^G + \omega_2 X_2 + Z_2, \quad (187)$$

where  $Z_1$  (resp  $Z_2$ ) is a Gaussian random variable independent of  $X_1$  (resp  $(\hat{X}_1^G, X_2)$ ) and  $\hat{X}_j^G \sim \mathcal{N}(0, \hat{\sigma}_j^2)$  for  $j = 1, 2$ , and  $\nu, \omega_1, \omega_2, \hat{\sigma}_1^2, \hat{\sigma}_2^2$  are the solutions of the following optimization program for the first step,

$$\min_{\nu, \hat{\sigma}_1^2} \sigma_1^2 + \hat{\sigma}_1^2 - 2\nu\sigma_1^2, \quad (188a)$$

$$\text{s.t.} \quad \nu^2 \sigma_1^2 \leq \hat{\sigma}_1^2 (1 - 2^{-2R_1}), \quad (188b)$$

$$(\sigma_1 - \hat{\sigma}_1)^2 \leq P_1, \quad (188c)$$

and the following minimization problem for the second step and PLF-FMD,

$$\min_{\omega_1, \omega_2, \hat{\sigma}_2^2} \sigma_2^2 + \hat{\sigma}_2^2 - 2\nu\omega_1\rho_1\sigma_1\sigma_2 - 2\omega_2\sigma_2^2, \quad (189a)$$

$$\text{s.t.} \quad \omega_2^2 \sigma_2^2 (1 - 2^{-2R_2} \frac{\nu^2 \rho_1^2 \sigma_1^2}{\hat{\sigma}_1^2}) \leq (\hat{\sigma}_2^2 - \omega_1^2 \hat{\sigma}_1^2 - 2\omega_1\omega_2\nu\rho_1\sigma_1\sigma_2)(1 - 2^{-2R_2}), \quad (189b)$$

$$(\sigma_2 - \hat{\sigma}_2)^2 \leq P_2, \quad (189c)$$

or the following minimization problem for the second step and PLF-JD,

$$\min_{\omega_1, \omega_2, \hat{\sigma}_2^2} \sigma_2^2 + \hat{\sigma}_2^2 - 2\nu\omega_1\rho_1\sigma_1\sigma_2 - 2\omega_2\sigma_2^2 \quad (190a)$$

$$\text{s.t.} \quad \omega_2^2 \sigma_2^2 (1 - 2^{-2R_2} \frac{\nu^2 \rho_1^2 \sigma_1^2}{\hat{\sigma}_1^2}) \leq (\hat{\sigma}_2^2 - \omega_1^2 \hat{\sigma}_1^2 - 2\omega_1\omega_2\nu\rho_1\sigma_1\sigma_2)(1 - 2^{-2R_2}), \quad (190b)$$

$$\text{tr}(\Sigma_{12} + \hat{\Sigma}_{12} - 2(\Sigma_{12}^{1/2} \hat{\Sigma}_{12} \Sigma_{12}^{1/2})^{1/2}) \leq P_2, \quad (190c)$$

where  $\text{tr}(\cdot)$  denotes the trace of a matrix and

$$\Sigma_{12} := \begin{pmatrix} \sigma_1^2 & \rho_1\sigma_1\sigma_2 \\ \rho_1\sigma_1\sigma_2 & \sigma_2^2 \end{pmatrix}, \quad (191)$$

$$\hat{\Sigma}_{12} := \begin{pmatrix} \hat{\sigma}_1^2 & \omega_1\hat{\sigma}_1^2 + \nu\omega_2\rho_1\sigma_1\sigma_2 \\ \omega_1\hat{\sigma}_1^2 + \nu\omega_2\rho_1\sigma_1\sigma_2 & \hat{\sigma}_2^2 \end{pmatrix}. \quad (192)$$

579 *Proof:* We obtain the optimization programs for  $T = 2$  frames as follows.

For a given rate tuple  $R$ , the DP-tradeoff  $\mathcal{DP}(R)$  is given by the set of all tuples  $(D, P)$  such that there exists  $\hat{X}^G$  satisfying the following Markov chains

$$\hat{X}_1^G \rightarrow X_1 \rightarrow X_2, \quad (193)$$

$$\hat{X}_2^G \rightarrow (\hat{X}_1^G, X_2) \rightarrow X_1, \quad (194)$$

and the following conditions,

$$R_1 \geq I(X_1; \hat{X}_1^G), \quad (195)$$

$$R_2 \geq I(X_2; \hat{X}_2^G | \hat{X}_1^G), \quad (196)$$

and

$$D_j \geq \mathbb{E}[\|X_j - \hat{X}_j^G\|^2], \quad j = 1, 2, \quad (197)$$

$$P_j \geq W_2^2(P_{X_1 \dots X_j}, P_{\hat{X}_1^G \dots \hat{X}_j^G}). \quad (198)$$

In general, the set of reconstructions that satisfy (193)–(194) can be written as follows

$$\hat{X}_1^G = \nu X_1 + Z_1, \quad (199)$$

$$\hat{X}_2^G = \omega_1 \hat{X}_1^G + \omega_2 X_2 + Z_2. \quad (200)$$

Plugging the above into (195) and (196) yields the following rate expressions

$$\frac{1}{2} \log \frac{\hat{\sigma}_1^2}{\hat{\sigma}_1^2 - \nu^2 \sigma_1^2} \leq R_1, \quad (201)$$

$$\frac{1}{2} \log \frac{\hat{\sigma}_2^2 - (\omega_1 \hat{\sigma}_1 + \frac{\omega_2 \nu \rho_1 \sigma_1 \sigma_2}{\hat{\sigma}_1})^2}{\hat{\sigma}_2^2 - \omega_1^2 \hat{\sigma}_1^2 - \omega_2^2 \sigma_2^2 - 2\omega_1 \omega_2 \nu \rho_1 \sigma_1 \sigma_2} \leq R_2. \quad (202)$$

Re-arranging the terms in the above constraints yields the conditions in (188b) and (190b). Considering (197) with (199)–(200) gives the following expressions for distortions

$$\mathbb{E}[\|X_1 - \hat{X}_1^G\|^2] = \sigma_1^2 + \hat{\sigma}_1^2 - 2\mathbb{E}[X_1 \hat{X}_1^G] = \sigma_1^2 + \hat{\sigma}_1^2 - 2\nu \sigma_1^2, \quad (203)$$

$$\mathbb{E}[\|X_2 - \hat{X}_2^G\|^2] = \sigma_2^2 + \hat{\sigma}_2^2 - 2\mathbb{E}[X_2 \hat{X}_2^G] = \sigma_2^2 + \hat{\sigma}_2^2 - 2\omega_1 \nu \rho_1 \sigma_1 \sigma_2 - 2\omega_2 \sigma_2^2, \quad (204)$$

580 which are the objective functions in (188a) and (190a). Now, we evaluate the perception constraint.  
 581 Notice that the covariance matrices of  $(X_1, X_2)$  and  $(\hat{X}_1^G, \hat{X}_2^G)$  are given by  $\Sigma_{12}$  and  $\hat{\Sigma}_{12}$  defined  
 582 in (191) and (192), respectively. The Wasserstein-2 distance between two Gaussian distributions with  
 583 covariance matrices  $\Sigma_{12}$  and  $\hat{\Sigma}_{12}$  is given in (190c) as discussed in [26, pp. 18].

584 Similarly, the expressions in (189) for the decoder based on PLF-FMD can be obtained. ■

## 585 F Gauss-Markov Source Model: Extremal Rates

In this section, we derive the achievable reconstructions for some special cases. We assume that we have only two frames, i.e.,  $D_3, P_3 \rightarrow \infty$ . Moreover, let  $\sigma_1^2 = \sigma_2^2 := \sigma^2$  for simplicity. In general, the reconstructions can be written as follows

$$\hat{X}_1^G = \nu X_1 + Z_1, \quad (205)$$

$$\hat{X}_2^G = \omega_1 \hat{X}_1^G + \omega_2 X_2 + Z_2, \quad (206)$$

where  $\hat{X}_j^G \sim \mathcal{N}(0, \hat{\sigma}_j^2)$  for  $j = 1, 2$ . Recall the optimization program of the first step in (188) as follows

$$\min_{\nu, \hat{\sigma}_1^2} \sigma^2 + \hat{\sigma}_1^2 - 2\nu \sigma^2, \quad (207a)$$

$$\text{s.t.} \quad \nu^2 \sigma^2 \leq \hat{\sigma}_1^2 (1 - 2^{-2R_1}), \quad (207b)$$

$$(\sigma - \hat{\sigma}_1)^2 \leq P_1, \quad (207c)$$

For a given  $\hat{\sigma}_1^2$ , the objective function in (207a) is a monotonically decreasing function of  $\nu$ , hence one can restrict  $\nu$  to be nonnegative, without loss of optimality. So, the above optimization program can be written as

$$\min_{\nu, \hat{\sigma}_1^2} \sigma^2 + \hat{\sigma}_1^2 - 2\nu\sigma^2, \quad (208a)$$

$$\text{s.t.} \quad 0 \leq \nu \leq \frac{\hat{\sigma}_1}{\sigma} \sqrt{1 - 2^{-2R_1}}, \quad (208b)$$

$$(\sigma - \hat{\sigma}_1)^2 \leq P_1, \quad (208c)$$

Optimizing with respect to  $\nu$  in the above program, we have

$$\nu = \frac{\hat{\sigma}_1}{\sigma} \sqrt{1 - 2^{-2R_1}}, \quad (209)$$

where the optimization program reduces to

$$\min_{\hat{\sigma}_1^2} \sigma^2 + \hat{\sigma}_1^2 - 2\sigma\hat{\sigma}_1 \sqrt{1 - 2^{-2R_1}}, \quad (210a)$$

$$\text{s.t.} \quad (\sigma - \hat{\sigma}_1)^2 \leq P_1. \quad (210b)$$

Next, recall the optimization program of the second step for PLF-FMD in (189) as follows

$$\min_{\omega_1, \omega_2, \hat{\sigma}_2^2} \sigma^2 + \hat{\sigma}_2^2 - 2\nu\omega_1\rho_1\sigma^2 - 2\omega_2\sigma^2, \quad (211a)$$

$$\text{s.t.} \quad \omega_2^2\sigma^2(1 - 2^{-2R_2} \frac{\nu^2\rho_1^2\sigma^2}{\hat{\sigma}_1^2}) \leq (\hat{\sigma}_2^2 - \omega_1^2\hat{\sigma}_1^2 - 2\omega_1\omega_2\nu\rho_1\sigma^2)(1 - 2^{-2R_2}), \quad (211b)$$

$$(\sigma - \hat{\sigma}_2)^2 \leq P_2, \quad (211c)$$

Plugging (209) into the above program, we get

$$\min_{\omega_1, \omega_2, \hat{\sigma}_2^2} \sigma^2 + \hat{\sigma}_2^2 - 2\omega_1\rho_1\hat{\sigma}_1\sigma\sqrt{1 - 2^{-2R_1}} - 2\omega_2\sigma^2, \quad (212a)$$

$$\text{s.t.} \quad \omega_2^2\sigma^2(1 - \rho_1^2 2^{-2R_2}(1 - 2^{-2R_1})) \leq (\hat{\sigma}_2^2 - \omega_1^2\hat{\sigma}_1^2 - 2\omega_1\omega_2\rho_1\hat{\sigma}_1\sigma\sqrt{1 - 2^{-2R_1}})(1 - 2^{-2R_2}), \quad (212b)$$

$$(\sigma - \hat{\sigma}_2)^2 \leq P_2, \quad (212c)$$

586 The optimization program for the second step of PLF-JD is similar to the above program (212) when  
 587 (212c) is replaced by (190c). In this section, we study different rate regimes and obtain the solutions  
 588 of the above optimization programs. In particular, we are interested in two perception thresholds  
 589  $P_2 \rightarrow \infty$  and  $P_2 = 0$  where the former corresponds to the classical rate-distortion region and the  
 590 latter is the case of 0-PLF. For the 0-PLF-FMD, we have  $\hat{\sigma}_1 = \hat{\sigma}_2 = \sigma$ . For the 0-PLF-JD, in addition  
 591 to preserving the marginals, the correlation  $\mathbb{E}[\hat{X}_1^G \hat{X}_2^G] = \rho_1\sigma^2$  should be satisfied. For each of these  
 592 cases, the optimization program in (212) is simplified in the following.

*Optimization Program of the Second Step for  $P \rightarrow \infty$ :* In this case, there is no perception constraint in the setting and the optimization program in (212) reduces to the following

$$\min_{\hat{\sigma}_2^2, \omega_1, \omega_2} \sigma^2 + \hat{\sigma}_2^2 - 2\omega_1\rho_1\hat{\sigma}_1\sigma\sqrt{1 - 2^{-2R_1}} - 2\omega_2\sigma^2, \quad (213a)$$

$$\text{s.t.} \quad \omega_2^2\sigma^2(1 - \rho_1^2 2^{-2R_2}(1 - 2^{-2R_1})) \leq (\hat{\sigma}_2^2 - \omega_1^2\hat{\sigma}_1^2 - 2\omega_1\omega_2\rho_1\hat{\sigma}_1\sigma\sqrt{1 - 2^{-2R_1}})(1 - 2^{-2R_2}). \quad (213b)$$

593 This case corresponds to the classical rate-distortion tradeoff where it is shown that for a given rate,  
 594 the MMSE reconstructions are indeed optimal [28, 37]. The expressions for MMSE reconstructions  
 595 are given in Appendix H.1

*Optimization Program of the Second Step for 0-PLF-FMD:* In this case, we have  $\hat{\sigma}_1 = \hat{\sigma}_2 = \sigma$ . So, the optimization program in (212) reduces to the following

$$\min_{\omega_1, \omega_2} 2\sigma^2 - 2\omega_1\rho_1\sigma^2\sqrt{1 - 2^{-2R_1}} - 2\omega_2\sigma^2, \quad (214a)$$

$$\text{s.t.} \quad \omega_2^2(1 - \rho_1^2 2^{-2R_2}(1 - 2^{-2R_1})) \leq (1 - \omega_1^2 - 2\omega_1\omega_2\rho_1\sqrt{1 - 2^{-2R_1}})(1 - 2^{-2R_2}). \quad (214b)$$

Here,  $\omega_1$  and  $\omega_2$  only need to satisfy the rate constraint given in (214b) which represents a larger search space than that of 0-PLF-JD which will be discussed in the following.

*Optimization Program of the Second Step for 0-PLF-JD:* In this case, in addition to preserving marginals  $\hat{\sigma}_1 = \hat{\sigma}_2 = \sigma$ , we need to satisfy the constraint  $\mathbb{E}[\hat{X}_1^G \hat{X}_2^G] = \rho_1 \sigma^2$ . Thus, the optimization program of this case has an extra condition  $\omega_1 + \nu \omega_2 \rho_1 = \rho_1$  comparing to (214) and it is given as follows

$$\min_{\omega_1, \omega_2} 2\sigma^2 - 2\omega_1 \rho_1 \sigma^2 \sqrt{1 - 2^{-2R_1}} - 2\omega_2 \sigma^2, \quad (215a)$$

$$\begin{aligned} \text{s.t.} \quad & \omega_2^2 (1 - \rho_1^2 2^{-2R_2} (1 - 2^{-2R_1})) \leq (1 - \omega_1^2 - 2\omega_1 \omega_2 \rho_1 \sqrt{1 - 2^{-2R_1}}) (1 - 2^{-2R_2}), \\ & \omega_1 + \nu \omega_2 \rho_1 = \rho_1. \end{aligned} \quad (215b)$$

Comparing (215) with (214), we notice that the search space of the optimization program for 0-PLF-JD is smaller than that of 0-PLF-FMD. Thus, a larger distortion is expected for 0-PLF-JD.

Before studying each case of extremal rates, we introduce another constraint in the optimization program of all above three cases of perception metrics. We restrict to nonnegative  $\omega_1 \omega_2 \rho_1$  and get an upper bound on the programs (213), (214) and (215). So, in further discussion on these programs, the constraint  $\omega_1 \omega_2 \rho_1 \geq 0$  will be also considered.

1)  $R_1 = R_2 = \epsilon$  for small  $\epsilon$ :

In the low-rate regime, notice that we can approximate the rate term as follows

$$1 - 2^{-2\epsilon} = 2\epsilon \ln 2 + O(\epsilon^2). \quad (216)$$

Plugging the above into (209), we have

$$\nu = \frac{\hat{\sigma}_1}{\sigma} \sqrt{2\epsilon \ln 2 + O(\epsilon^2)}. \quad (217)$$

Also, inserting (216) into the rate constraint of the second step (211c) yields the following

$$\omega_2^2 \sigma^2 (1 - \rho_1^2 2\epsilon \ln 2 + O(\epsilon^2)) \leq (\hat{\sigma}_2^2 - \omega_1^2 \hat{\sigma}_1^2 - 2\omega_1 \omega_2 \rho_1 \hat{\sigma}_1 \sigma \sqrt{2\epsilon \ln 2 + O(\epsilon^2)}) (2\epsilon \ln 2 + O(\epsilon^2)). \quad (218)$$

Re-arranging the terms in the above inequality yields the following

$$\hat{\sigma}_2^2 \geq \frac{\omega_2^2 \sigma^2 (1 - \rho_1^2 2\epsilon \ln 2 + O(\epsilon^2))}{2\epsilon \ln 2 + O(\epsilon^2)} + \omega_1^2 \hat{\sigma}_1^2 + 2\omega_1 \omega_2 \rho_1 \hat{\sigma}_1 \sigma \sqrt{2\epsilon \ln 2 + O(\epsilon^2)} \quad (219)$$

$$= \omega_2^2 \sigma^2 \left( \frac{1}{2\epsilon \ln 2} + O(1) \right) + \omega_1^2 \hat{\sigma}_1^2 + 2\omega_1 \omega_2 \rho_1 \hat{\sigma}_1 \sigma \sqrt{2\epsilon \ln 2 + O(\epsilon^2)} \quad (220)$$

So, in all of the optimization programs of the case  $R_1 = R_2 = \epsilon$ , the above constraint (220) will replace the rate constraint of the second step.

Now, we consider different cases based on the perception measure.

a) *Without a perception constraint:* In this case, using (216), the optimization program of the first step in (210) simplifies to the following

$$D_1 = \min_{\hat{\sigma}_1^2} \sigma^2 + \hat{\sigma}_1^2 - 2\sigma \hat{\sigma}_1 \sqrt{2\epsilon \ln 2 + O(\epsilon^2)}, \quad (221)$$

which gives us the following optimal solution

$$\hat{\sigma}_1 = \sqrt{2\epsilon \ln 2 + O(\epsilon^2)} \sigma = \sqrt{2\epsilon \ln 2} \sigma + O(\epsilon). \quad (222)$$

Plugging the above solution into (217) and (221), we get

$$\nu = 2\epsilon \ln 2 + O(\epsilon^2), \quad (223)$$

<sup>1</sup>The inequalities of the form  $f(\epsilon) + O(\epsilon^2) \leq g(\epsilon) + O(\epsilon^2)$ , where  $f(\epsilon), g(\epsilon) = \Omega(\epsilon^2)$ , imply that  $f(\epsilon) \leq g(\epsilon)$ . So, in such inequalities, we work with dominant terms ( $f(\epsilon), g(\epsilon)$ ) and ignore the small terms  $O(\epsilon^2)$ . A similar argument holds if we have other orders of  $\epsilon$  and the functions  $f(\cdot), g(\cdot)$  approach zero slower than them.

and

$$D_1 = (1 - 2\epsilon \ln 2)\sigma^2 + O(\epsilon^2). \quad (224)$$

Now, we look at the optimization program of the second step (213). For a given  $\omega_1$  and  $\omega_2$ , the objective function is an increasing function of  $\hat{\sigma}_2^2$ , so optimizing over  $\hat{\sigma}_2^2$  yields the following

$$\hat{\sigma}_2^2 = \omega_2^2 \sigma^2 \left( \frac{1}{2\epsilon \ln 2} + O(1) \right) + \omega_1^2 \hat{\sigma}_1^2 + 2\omega_1 \omega_2 \rho_1 \hat{\sigma}_1 \sigma \sqrt{2\epsilon \ln 2 + O(\epsilon^2)}. \quad (225)$$

Thus, the optimization program (213) is further upper bounded by the following

$$\min_{\substack{\hat{\sigma}_2^2, \omega_1, \omega_2: \\ \omega_1 \omega_2 \rho_1 \geq 0}} \sigma^2 + \omega_2^2 \sigma^2 \left( \frac{1}{2\epsilon \ln 2} + O(1) \right) + \omega_1^2 \hat{\sigma}_1^2 - 2(1 - \omega_2) \omega_1 \rho_1 \hat{\sigma}_1 \sigma \sqrt{2\epsilon \ln 2 + O(\epsilon^2)} - 2\omega_2 \sigma^2. \quad (226)$$

The optimal solution of the above minimization is given by the following

$$\omega_1 = \rho_1 + O(\epsilon), \quad (227)$$

$$\omega_2 = 2\epsilon \ln 2 + O(\epsilon^2). \quad (228)$$

Thus, considering the dominant terms of (223), (227) and (228), we have

$$\hat{X}_1^G = (2\epsilon \ln 2)X_1 + Z_1, \quad (229)$$

$$\hat{X}_2^G = \rho_1 \hat{X}_1^G + (2\epsilon \ln 2)X_2 + Z_2, \quad (230)$$

and  $Z_j \sim \mathcal{N}(0, 2\epsilon \sigma^2 \ln 2)$  for  $j = 1, 2$ . Notice that

$$D_1 = (1 - 2\epsilon \ln 2)\sigma^2, \quad (231)$$

$$D_2 = (1 - (1 + \rho_1^2)2\epsilon \ln 2)\sigma^2. \quad (232)$$

*b) 0-PLF-FMD:* In this case, we have  $\hat{\sigma}_1 = \hat{\sigma}_2 = \sigma$ . For the optimization program of the first step, (209) reduces to the following

$$\nu = \sqrt{2\epsilon \ln 2} + O(\epsilon), \quad (233)$$

and  $D_1$  is given in the following which is derived by (210)

$$D_1 = 2(1 - \sqrt{2\epsilon \ln 2})\sigma^2 + O(\epsilon). \quad (234)$$

Now, we study the optimization program of the second step. The optimization program of (214) is further upper bounded by the following

$$\min_{\substack{\omega_1, \omega_2: \\ \omega_1 \omega_2 \rho_1 \geq 0}} 2\sigma^2 - 2\omega_1 \rho_1 \sigma^2 \sqrt{2\epsilon \ln 2 + O(\epsilon^2)} - 2\omega_2 \sigma^2, \quad (235a)$$

$$\text{s.t.} \quad 1 \geq \sqrt{\omega_2^2 \left( \frac{1}{2\epsilon \ln 2} + O(1) \right) + \omega_1^2 + 2\omega_1 \omega_2 \rho_1 \sqrt{2\epsilon \ln 2 + O(\epsilon^2)}}. \quad (235b)$$

Now, we further simplify the inequality (235b) in the following. Considering the fact that  $\omega_1 \omega_2 \rho_1 \geq 0$ , this inequality implies that

$$\omega_1^2 \leq 1, \quad (236)$$

$$\omega_2^2 \leq 2\epsilon \ln 2 + O(\epsilon^2). \quad (237)$$

So, using the above inequalities, the RHS of (235b) can be upper bounded as follows

$$\begin{aligned} & \sqrt{\omega_2^2 \left( \frac{1}{2\epsilon \ln 2} + O(1) \right) + \omega_1^2 + 2\omega_1 \omega_2 \rho_1 \sqrt{2\epsilon \ln 2 + O(\epsilon^2)}} \\ & \leq \sqrt{\omega_2^2 \left( \frac{1}{2\epsilon \ln 2} + O(1) \right) + \omega_1^2 + (\omega_1^2 + \omega_2^2) \rho_1 \sqrt{2\epsilon \ln 2 + O(\epsilon^2)}} \\ & \leq \sqrt{\omega_2^2 \left( \frac{1}{2\epsilon \ln 2} + O(1) \right) + \omega_1^2 + O(\epsilon^{3/2})}. \end{aligned} \quad (238)$$

Now, according to (238), the optimization program in (235) is further upper bounded by the following

$$\min_{\substack{\omega_1, \omega_2: \\ \omega_1 \omega_2 \rho_1 \geq 0}} 2\sigma^2 - 2\omega_1 \rho_1 \sigma^2 \sqrt{2\epsilon \ln 2 + O(\epsilon^2)} - 2\omega_2 \sigma^2, \quad (239a)$$

$$\text{s.t.} \quad 1 \geq \sqrt{\omega_2^2 \left( \frac{1}{2\epsilon \ln 2} + O(1) \right) + \omega_1^2 + O(\epsilon^{3/2})}. \quad (239b)$$

For a given  $\omega_1$  (resp  $\omega_2$ ), the objective function (239a) is a monotonically decreasing function of  $\omega_2$  (resp  $\omega_1$ ), so the optimal solution is attained on the boundary, i.e.,

$$1 = \sqrt{\omega_2^2 \left( \frac{1}{2\epsilon \ln 2} + O(1) \right) + \omega_1^2 + O(\epsilon^{3/2})} \quad (240)$$

Thus, the program (239) further simplifies to the following

$$\min_{\substack{\omega_1: \\ \omega_1 \rho_1 \geq 0}} 2\sigma^2 - 2\omega_1 \rho_1 \sigma^2 \sqrt{2\epsilon \ln 2 + O(\epsilon^2)} - 2\sigma^2 \sqrt{(1 - \omega_1^2 - O(\epsilon^{3/2}))(2\epsilon \ln 2 + O(\epsilon^2))}. \quad (241)$$

The optimal solution of the above program is given by

$$\omega_1 = \frac{\rho_1}{\sqrt{1 + \rho_1^2}} + O(\epsilon), \quad (242)$$

which together with (240) yields

$$\omega_2 = \sqrt{\frac{2\epsilon \ln 2}{1 + \rho_1^2}} + O(\epsilon). \quad (243)$$

Thus, considering dominant terms of (233), (242) and (243), we get

$$\hat{X}_1^G = \sqrt{2\epsilon \ln 2} X_1 + Z_1, \quad (244)$$

$$\hat{X}_2^G = \frac{\rho_1}{\sqrt{1 + \rho_1^2}} \hat{X}_1^G + \sqrt{\frac{2\epsilon \ln 2}{1 + \rho_1^2}} X_2 + Z_2, \quad (245)$$

where  $Z_1 \sim \mathcal{N}(0, (1 - 2\epsilon \ln 2)\sigma^2)$  and

$$Z_2 \sim \mathcal{N}(0, (1 - \frac{\rho_1^2}{1 + \rho_1^2} - \frac{1 + 2\rho_1^2}{1 + \rho_1^2} 2\epsilon \ln 2)\sigma^2). \quad (246)$$

Notice that

$$D_1 = 2(1 - \sqrt{2\epsilon \ln 2})\sigma^2, \quad (247)$$

$$D_2 = 2(1 - \sqrt{(1 + \rho_1^2)2\epsilon \ln 2})\sigma^2. \quad (248)$$

For the special case of  $\rho_1 = 1$ , the expressions in (244) and (245) simplify as follows

$$\hat{X}_1^G = \sqrt{2\epsilon \ln 2} X_1 + Z_1, \quad (249)$$

$$\hat{X}_2^G = \sqrt{2}\sqrt{2\epsilon \ln 2} X_1 + \frac{1}{\sqrt{2}} Z_1 + Z_2. \quad (250)$$

Define  $Z_{\text{FMD}} := \frac{1}{\sqrt{2}} Z_1 + Z_2$  and notice that  $Z_{\text{FMD}} \sim \mathcal{N}(0, (1 - 4\epsilon \ln 2)\sigma^2)$ . Moreover, we have

$$D_1 = 2(1 - \sqrt{2\epsilon \ln 2})\sigma^2, \quad (251)$$

$$D_2 = 2(1 - \sqrt{4\epsilon \ln 2})\sigma^2. \quad (252)$$

c) 0-PLF-JD: In this case, the optimization program of the first step is similar to the previous case. The optimization program of the second step is given in (215) where the condition  $\omega_1 + \nu\omega_2\rho_1 = \rho_1$  is introduced. According to (233),  $\nu = O(\sqrt{\epsilon})$  which suggests the following form for  $\omega_1$ ,

$$\omega_1 = \rho_1 - \delta_\epsilon, \quad (253)$$

for some small  $\delta_\epsilon$  that goes to zero as  $\epsilon \rightarrow 0$ . The parameter  $\delta_\epsilon$  will be determined later. Plugging  $\omega_1 = \rho_1 - \delta_\epsilon$  into (240), we find out that only the constant term of  $\omega_1$  contributes to a dominant term for  $\omega_2$  which yields the following

$$\omega_2 = \sqrt{2\epsilon \ln 2(1 - \rho_1^2)} + O(\epsilon). \quad (254)$$

Thus, we have

$$\hat{X}_1^G = \sqrt{2\epsilon \ln 2} X_1 + Z_1, \quad (255)$$

$$\hat{X}_2^G = (\rho_1 - \delta_\epsilon) \hat{X}_1^G + \sqrt{(1 - \rho_1^2)2\epsilon \ln 2} X_2 + Z_2, \quad (256)$$

Now, applying the constraint  $\mathbb{E}[\hat{X}_1^G \hat{X}_2^G] = \rho_1 \sigma^2$ , we get

$$\delta_\epsilon = \rho_1 \sqrt{1 - \rho_1^2} (2\epsilon \ln 2). \quad (257)$$

However, notice that since  $\delta_\epsilon = O(\epsilon)$ , it does not contribute to dominant terms of distortion. So, we can simply represent  $\hat{X}_1^G$  and  $\hat{X}_2^G$  as follows

$$\hat{X}_1^G = \sqrt{2\epsilon \ln 2} X_1 + Z_1, \quad (258)$$

$$\hat{X}_2^G = \rho_1 \hat{X}_1^G + \sqrt{(1 - \rho_1^2)2\epsilon \ln 2} X_2 + Z_2, \quad (259)$$

where  $Z_1 \sim \mathcal{N}(0, (1 - 2\epsilon \ln 2)\sigma^2)$  and  $Z_2 \sim \mathcal{N}(0, (1 - \rho_1^2 - (1 - \rho_1^2 + 2\rho_1^2 \sqrt{1 - \rho_1^2})2\epsilon \ln 2)\sigma^2)$ . The following distortions are also achievable

$$D_1 = 2(1 - \sqrt{2\epsilon \ln 2})\sigma^2, \quad (260)$$

$$D_2 = 2(1 - (\rho_1^2 + \sqrt{1 - \rho_1^2})\sqrt{2\epsilon \ln 2})\sigma^2. \quad (261)$$

608 For the special case of  $\rho = 1$ , according to (259) and (261), we have  $\hat{X}_2^G = \hat{X}_1^G$  and  $D_2 = D_1$ .

2)  $R_1 \rightarrow \infty$ ,  $R_2 = \epsilon$  for small  $\epsilon$ : In this case, since  $R_1 \rightarrow \infty$ , we have  $\hat{X}_1^G = X_1$ ,  $D_1 = 0$ , and we only need to solve the optimization program of the second step. Also, we have the following approximation

$$1 - 2^{-2R_2} = 1 - 2^{-2\epsilon} = 2\epsilon \ln 2 + O(\epsilon^2). \quad (262)$$

609 We consider three different cases based on the perception constraint.

a) *Without a perception constraint*: In this case, consider the optimization program (213). For a given  $\omega_1$  and  $\omega_2$ , the objective function is an increasing function of  $\hat{\sigma}_2^2$ , hence optimizing over  $\hat{\sigma}_2^2$ , we get

$$\hat{\sigma}_2^2 = \frac{\omega_2^2 \sigma^2 (1 - \rho_1^2 + O(\epsilon))}{2\epsilon \ln 2 + O(\epsilon^2)} + \omega_1^2 \sigma^2 + 2\omega_1 \omega_2 \rho_1 \sigma^2. \quad (263)$$

The program in (213) is further upper bounded by the following

$$\min_{\substack{\omega_1, \omega_2: \\ \omega_1 \omega_2 \rho_1 \geq 0}} \sigma^2 + \frac{\omega_2^2 \sigma^2 (1 - \rho_1^2 + O(\epsilon))}{2\epsilon \ln 2 + O(\epsilon^2)} + \omega_1^2 \sigma^2 + 2\omega_1 \omega_2 \rho_1 \sigma^2 - 2\omega_1 \rho_1 \sigma^2 - 2\omega_2 \sigma^2, \quad (264)$$

The solution of the above optimization program is given by the following

$$\omega_1 = \rho_1 - \rho_1 (2\epsilon \ln 2), \quad (265)$$

$$\omega_2 = 2\epsilon \ln 2. \quad (266)$$

Thus, we have

$$\hat{X}_1^G = X_1, \quad (267)$$

$$\hat{X}_2^G = (\rho_1 - \rho_1 (2\epsilon \ln 2)) X_1 + (2\epsilon \ln 2) X_2 + Z_2, \quad (268)$$

610 where  $Z_2 \sim \mathcal{N}(0, (1 - \rho_1^2)\sigma^2 2\epsilon \ln 2)$ . So, the reconstruction of the second frame closely resembles  
611 the first frame. The distortions of the first and second frames are zero and  $(1 - \rho_1^2 - (1 - \rho_1^2)2\epsilon \ln 2)\sigma^2$ ,  
612 respectively.

b) 0-PLF-FMD: In this case,  $\hat{\sigma}_1 = \hat{\sigma}_2 = \sigma$ . Thus, the optimization program in (214) is further upper bounded by the following

$$\min_{\substack{\omega_1, \omega_2: \\ \omega_1 \omega_2 \rho_1 \geq 0}} 2\sigma^2 - 2\omega_1 \rho_1 \sigma^2 - 2\omega_2 \sigma^2, \quad (269a)$$

$$\text{s.t.} \quad \omega_2^2(1 - \rho_1^2 + O(\epsilon)) \leq (1 - \omega_1^2 - 2\omega_1 \omega_2 \rho_1)(2\epsilon \ln 2 + O(\epsilon^2)). \quad (269b)$$

For a given  $\omega_1$  (resp  $\omega_2$ ), the objective function (269a) is a monotonically decreasing function of  $\omega_2$  (resp  $\omega_1$ ). So, the optimal solution is attained on the boundary, i.e., (269b) is satisfied with equality given as follows

$$\omega_2^2(1 - \rho_1^2 + O(\epsilon)) = (1 - \omega_1^2 - 2\omega_1 \omega_2 \rho_1)(2\epsilon \ln 2 + O(\epsilon^2)). \quad (270)$$

It can be easily verified that the first-order terms of  $\omega_1$  and  $\omega_2$  which optimize the program are 1 and 0, respectively. So, we write  $\omega_1$  and  $\omega_2$  in the following form

$$\omega_1 = 1 + (2\epsilon \ln 2)\delta_1 + O(\epsilon^2), \quad (271)$$

$$\omega_2 = (2\epsilon \ln 2)\delta_2 + O(\epsilon^2), \quad (272)$$

for some real  $\delta_1$  and  $\delta_2$ . Plugging the above (271) and (272) into (270) and considering the dominant terms, we get

$$\delta_2^2(1 - \rho_1^2) = -2\delta_1 - 2\rho_1\delta_2. \quad (273)$$

On the other side, we can write the objective function in (269) as follows

$$\begin{aligned} 2\sigma^2 - 2\omega_1 \rho_1 \sigma^2 - 2\omega_2 \sigma^2 \\ = 2\sigma^2 - 2\rho_1 \omega_1 \sigma^2 - 2\omega_2 \sigma^2 + O(\epsilon^2) \end{aligned} \quad (274)$$

$$= 2\sigma^2 - 2\rho_1 \sigma^2 - 2(\rho_1 \delta_1 \sigma^2 + \delta_2 \sigma^2)(2\epsilon \ln 2) + O(\epsilon^2) \quad (275)$$

$$= 2\sigma^2 - 2\rho_1 \sigma^2 - (-2\rho_1^2 \delta_2 \sigma^2 - \rho_1(1 - \rho_1^2)\delta_2^2 + 2\delta_2 \sigma^2)(2\epsilon \ln 2) + O(\epsilon^2). \quad (276)$$

Differentiating the above expression with respect to  $\delta_2$  and letting it be zero, we have:

$$\delta_2 = \frac{1}{\rho_1}, \quad \delta_1 = -\frac{1 + \rho_1^2}{2\rho_1^2}. \quad (277)$$

Thus, we have

$$\hat{X}_1^G = X_1, \quad (278)$$

$$\hat{X}_2^G = (1 - \frac{(1 + \rho_1^2)2\epsilon \ln 2}{2\rho_1^2})\hat{X}_1^G + \frac{2\epsilon \ln 2}{\rho_1}X_2 + Z_2, \quad (279)$$

613 where  $Z_2 \sim \mathcal{N}(0, (\frac{1 - \rho_1^2}{\rho_1^2})2\epsilon \ln 2)$ . Again, the reconstruction of the second frame is almost similar to

614 the first frame and the distortion is  $2(1 - \rho_1 - (\frac{1 - \rho_1^2}{2\rho_1})2\epsilon \ln 2)\sigma^2$ .

c) 0-PLF-JD: First consider the case where  $\rho_1 \neq 1$ . The optimization program is given in (215) where the constraint  $\omega_1 + \nu \rho_1 \omega_2 = \rho_1$  is introduced. Notice that  $\omega_1$  can be written in the following form

$$\omega_1 = \rho_1 + \delta_\epsilon, \quad (280)$$

for some  $\delta_\epsilon$  that goes to zero as  $\epsilon \rightarrow 0$ . The parameter  $\delta_\epsilon$  will be determined later. Plugging  $\omega_1 = \rho_1 + \delta_\epsilon$  into (270) yields the following

$$\omega_2 = \sqrt{2\epsilon \ln 2} + O(\epsilon), \quad (281)$$

which is derived only through the first-order term of  $\omega_1$  which is  $\rho_1$ . Now, considering the fact that  $\mathbb{E}[\hat{X}_1^G \hat{X}_2^G] = \rho_1 \sigma^2$ , we obtain

$$\delta_\epsilon = -\rho_1 \sqrt{2\epsilon \ln 2}. \quad (282)$$

Thus, we have

$$\hat{X}_1^G = X_1, \quad (283)$$

$$\hat{X}_2^G = (\rho_1 - \rho_1 \sqrt{2\epsilon \ln 2})\hat{X}_1^G + \sqrt{2\epsilon \ln 2}X_2 + Z_2, \quad (284)$$

615 where  $Z_2 \sim \mathcal{N}(0, (1 - \rho_1^2)\sigma^2)$ . Here, the reconstruction of the second frame closely resembles the  
616 first frame. The distortion of the second frame is  $2(1 - \rho_1^2 - (1 - \rho_1^2)\sqrt{2\epsilon \ln 2})\sigma^2$ .

617 If  $\rho_1 = 1$ , we simply have  $\hat{X}_2^G = \hat{X}_1^G = X_1 = X_2$  which can be derived from (283)–(284) by letting  
618  $X_1 = X_2$ .

619 The analysis for the case of  $R_1 = \epsilon$  and  $R_2 \rightarrow \infty$  is similar and is omitted for brevity. The results of  
620 this section are summarized in Table 2.

**Table 2:** Achievable reconstructions for extremal rates and different PLFs (The first, second and third rows represent reconstructions corresponding to the MMSE, 0-PLF-FMD and 0-PLF-JD, respectively).

|           | $R_1 = R_2 = \epsilon$                                                                                           | $R_1 \rightarrow \infty, R_2 = \epsilon$                                                                                 | $R_1 = \epsilon, R_2 = \infty$                                              |
|-----------|------------------------------------------------------------------------------------------------------------------|--------------------------------------------------------------------------------------------------------------------------|-----------------------------------------------------------------------------|
| MMSE      | $\hat{X}_1^G = (2\epsilon \ln 2)X_1 + Z_1$                                                                       | $\hat{X}_1^G = X_1$                                                                                                      | $\hat{X}_1^G = (2\epsilon \ln 2)X_1 + Z_1$                                  |
|           | $\hat{X}_2^G = \rho_1 \hat{X}_1^G + (2\epsilon \ln 2)X_2 + Z_2$                                                  | $\hat{X}_2^G = (\rho_1 - \rho_1 2\epsilon \ln 2)\hat{X}_1^G + (2\epsilon \ln 2)X_2 + Z_2$                                | $\hat{X}_2^G = X_2$                                                         |
|           | $Z_j \sim \mathcal{N}(0, 2\epsilon \sigma^2 \ln 2)$                                                              | $Z_2 \sim \mathcal{N}(0, (1 - \rho_1^2)2\epsilon \sigma^2 \ln 2)$                                                        | $Z_1 \sim \mathcal{N}(0, 2\epsilon \sigma^2 \ln 2)$                         |
|           | $D_1 = (1 - 2\epsilon \ln 2)\sigma^2$                                                                            | $D_1 = 0$                                                                                                                | $D_1 = (1 - 2\epsilon \ln 2)\sigma^2$                                       |
| 0-PLF-FMD | $\hat{X}_1^G = \sqrt{2\epsilon \ln 2}X_1 + Z_1$                                                                  | $\hat{X}_1^G = X_1$                                                                                                      | $\hat{X}_1^G = \sqrt{2\epsilon \ln 2}X_1 + Z_1$                             |
|           | $\hat{X}_2^G = \frac{\rho_1}{\sqrt{1+\rho_1^2}}\hat{X}_1^G + \sqrt{\frac{2\epsilon \ln 2}{1+\rho_1^2}}X_2 + Z_2$ | $\hat{X}_2^G = (1 - \frac{(1+\rho_1^2)2\epsilon \ln 2}{2\rho_1^2})\hat{X}_1^G + \frac{2\epsilon \ln 2}{\rho_1}X_2 + Z_2$ | $\hat{X}_2^G = X_2$                                                         |
|           | $Z_1 \sim \mathcal{N}(0, (1 - 2\epsilon \ln 2)\sigma^2)$                                                         | $Z_2 \sim \mathcal{N}(0, (\frac{1-\rho_1^2}{\rho_1^2})2\epsilon \ln 2)$                                                  | $Z_1 \sim \mathcal{N}(0, (1 - 2\epsilon \ln 2)\sigma^2)$                    |
|           | $D_1 = 2(1 - \sqrt{2\epsilon \ln 2})\sigma^2$                                                                    | $D_1 = 0$                                                                                                                | $D_1 = 2(1 - \sqrt{2\epsilon \ln 2})\sigma^2$                               |
| 0-PLF-JD  | $\hat{X}_1^G = \sqrt{2\epsilon \ln 2}X_1 + Z_1$                                                                  | $\hat{X}_1^G = X_1$                                                                                                      | $\hat{X}_1^G = \sqrt{2\epsilon \ln 2}X_1 + Z_1$                             |
|           | $\hat{X}_2^G = \rho_1 \hat{X}_1^G + \sqrt{(1 - \rho_1^2)2\epsilon \ln 2}X_2 + Z_2$                               | $\hat{X}_2^G = (\rho_1 - \rho_1 \sqrt{2\epsilon \ln 2})\hat{X}_1^G + \sqrt{2\epsilon \ln 2}X_2 + Z_2$                    | $\hat{X}_2^G = \rho_1 \hat{X}_1^G + \sqrt{1 - \rho_1^2}X_2$                 |
|           | $Z_1 \sim \mathcal{N}(0, (1 - 2\epsilon \ln 2)\sigma^2)$                                                         | $Z_2 \sim \mathcal{N}(0, (1 - \rho_1^2)\sigma^2)$                                                                        | $Z_1 \sim \mathcal{N}(0, (1 - 2\epsilon \ln 2)\sigma^2)$                    |
|           | $D_1 = 2(1 - \sqrt{2\epsilon \ln 2})\sigma^2$                                                                    | $D_1 = 0$                                                                                                                | $D_1 = 2\sigma^2$                                                           |
|           | $D_2 = 2(1 - (\rho_1^2 + \sqrt{1 - \rho_1^2})\sqrt{2\epsilon \ln 2})\sigma^2$                                    | $D_2 = 2(1 - \rho_1^2 - (1 - \rho_1^2)\sqrt{2\epsilon \ln 2})\sigma^2$                                                   | $D_2 = 2(1 - \sqrt{1 - \rho_1^2} - \rho_1^2\sqrt{2\epsilon \ln 2})\sigma^2$ |

<sup>a</sup> As justified in (253)–(259), the coefficient  $\omega_1$  (the coefficient of  $\hat{X}_1^G$  in  $\hat{X}_2^G$ ) has some correction terms of  $O(\epsilon)$  which are ignored in the presentation of  $\hat{X}_2^G$  since they do not contribute to dominant terms of distortion.

## 621 G Comparison of PLFs in Low-Rate Regime

**Theorem 6** For sufficiently small  $\epsilon$ , let  $R_j = \epsilon$  and suppose that  $\rho_j = \rho$  and  $\sigma_j = \sigma$ , for  $j = 1, \dots, T$ . The achievable distortions  $D_{FMD,j}$  (for 0-PLF-FMD), and  $D_{JD,j}$  (for 0-PLF-JD) are:

$$D_{FMD,j} = 2(1 - \Delta_{FMD,j}\sqrt{2\epsilon \ln 2})\sigma^2, \quad D_{JD,j} = 2(1 - \Delta_{JD,j}\sqrt{2\epsilon \ln 2})\sigma^2, \quad (285)$$

622 where  $\Delta_{FMD,j} := \sqrt{1 + \rho^2 \frac{(2\rho^2)^{j-1} - 1}{2\rho^2 - 1}}$  and  $\Delta_{JD,j} := \rho^{2(j-1)} + \mathbb{1}\{j \geq 2\} \cdot \sqrt{1 - \rho^2}(\sum_{i=0}^{j-2} \rho^{2i})$ .

623 *Proof:* We extend the proof in the previous section for the low-rate regime to  $T$  frames.

624 *Distortion Analysis for 0-PLF-FMD:*

625 We follow similar steps to (233)–(248) for optimization problems of the third and fourth frames and  
626 then use induction to derive expressions for  $T$  frames. For simplicity, we assume that  $\rho_j = \rho$  for all  $j$ .  
627 Notice that in the following proof,  $(\hat{X}_1^G, \hat{X}_2^G)$  are as in (205)–(206) where  $\nu, \omega_1$  and  $\omega_2$  are already  
628 derived in (233)–(248).

Now, consider the reconstruction of the third frame as follows

$$\hat{X}_3^G = \tau_1 \hat{X}_1^G + \tau_2 \hat{X}_2^G + \tau_3 X_3 + Z_3, \quad (286)$$

for some  $\tau_1, \tau_2, \tau_3$ , where  $\hat{X}_3^G \sim \mathcal{N}(0, \sigma^2)$  and  $Z_3$  is a Gaussian random variable independent of  $(\hat{X}_1^G, \hat{X}_2^G, X_3)$ . The rate constraint of the third step is given by

$$R_3 \geq I(X_3; \hat{X}_3^G | \hat{X}_1^G, \hat{X}_2^G). \quad (287)$$

Evaluating the above constraint with the choice of random variables  $(\hat{X}_1^G, \hat{X}_2^G, \hat{X}_3^G)$  and re-arranging the terms, we get

$$\begin{aligned} \tau_3^2 \sigma^2 (1 - 2^{-2R_3} (\rho^4 2^{-2R_1 - 2R_2} + \rho^2 (1 - \rho^2) 2^{-2R_2} - \rho^2)) \leq \\ (1 - 2^{-2R_3}) (1 - \tau_1^2 - \tau_2^2 - 2\tau_1 \tau_2 \omega_1 \nu - 2\tau_1 \tau_2 \omega_2 \nu \rho - 2\tau_2 \tau_3 \omega_1 \nu \rho^2 - 2\tau_2 \tau_3 \omega_2 \nu \rho - 2\tau_1 \tau_3 \nu \rho^2) \sigma^2. \end{aligned} \quad (288)$$

Similar to (240), considering the dominant terms of the above rate constraint and the fact that the solution of the optimization problem is attained when the above inequality is satisfied with “equality”, we get

$$(1 - \tau_1^2 - \tau_2^2 + O(\epsilon^{3/2}))(2\epsilon \ln 2 + O(\epsilon^2)) = \tau_3^2 (1 + O(\epsilon)). \quad (289)$$

The distortion can be written as follows

$$\mathbb{E}[\|X_3 - \hat{X}_3^G\|^2] = 2\sigma^2 - 2\tau_3 \sigma^2 - 2\tau_2 \omega_2 \rho \sigma^2 - 2\tau_2 \omega_1 \nu \rho^2 \sigma^2 - 2\tau_1 \nu \rho^2 \sigma^2. \quad (290)$$

So, the goal is to solve the following optimization problem for the third step

$$\min_{\tau_1, \tau_2, \tau_3} 2\sigma^2 - 2\tau_3 \sigma^2 - 2\tau_2 \omega_2 \rho \sigma^2 - 2\tau_2 \omega_1 \nu \rho^2 \sigma^2 - 2\tau_1 \nu \rho^2 \sigma^2 \quad (291)$$

$$\text{s.t. :} \quad (1 - \tau_1^2 - \tau_2^2 + O(\epsilon^{3/2}))(2\epsilon \ln 2 + O(\epsilon^2)) = \tau_3^2 (1 + O(\epsilon)). \quad (292)$$

We restrict the search space to  $\tau_1, \tau_2, \tau_3 \geq 0$  and get an upper bound to the above optimization program as follows

$$\min_{\tau_1, \tau_2, \tau_3 \geq 0} 2\sigma^2 - 2\tau_3 \sigma^2 - 2\tau_2 \omega_2 \rho \sigma^2 - 2\tau_2 \omega_1 \nu \rho^2 \sigma^2 - 2\tau_1 \nu \rho^2 \sigma^2 \quad (293)$$

$$\text{s.t. :} \quad (1 - \tau_1^2 - \tau_2^2 + O(\epsilon^{3/2}))(2\epsilon \ln 2 + O(\epsilon^2)) = \tau_3^2 (1 + O(\epsilon)). \quad (294)$$

The above optimization problem is equivalent to the following

$$\begin{aligned} \min_{\tau_1, \tau_2 \geq 0} \left( 2\sigma^2 - 2\sqrt{\frac{(2\epsilon \ln 2 + O(\epsilon^2))(1 - \tau_1^2 - \tau_2^2 + O(\epsilon^{3/2}))}{1 + O(\epsilon)}} \sigma^2 \right. \\ \left. - 2\tau_2 \omega_2 \rho \sigma^2 - 2\tau_2 \omega_1 \nu \rho^2 \sigma^2 - 2\tau_1 \nu \rho^2 \sigma^2 \right). \end{aligned} \quad (295)$$

We proceed with solving the above optimization program. Taking the derivative of the objective function with respect to  $\eta_1$  and  $\eta_2$  yields the following:

$$\frac{\eta_2}{\sqrt{1 - \eta_1^2 - \eta_2^2}} = \rho \sqrt{1 + \rho^2} + O(\epsilon), \quad (296)$$

$$\frac{\eta_1}{\sqrt{1 - \eta_1^2 - \eta_2^2}} = \rho^2 + O(\epsilon). \quad (297)$$

Solving the above set of equations, we get

$$\eta_1 = \frac{\rho^2}{\sqrt{1 + \rho^2 + 2\rho^4}} + O(\epsilon), \quad (298)$$

$$\eta_2 = \frac{\rho \sqrt{1 + \rho^2}}{\sqrt{1 + \rho^2 + 2\rho^4}} + O(\epsilon). \quad (299)$$

Thus, considering the dominant terms, we get the following reconstruction for the third frame

$$\hat{X}_3^G = \frac{\rho^2}{\sqrt{1 + \rho^2 + 2\rho^4}} \hat{X}_1^G + \frac{\rho \sqrt{1 + \rho^2}}{\sqrt{1 + \rho^2 + 2\rho^4}} \hat{X}_2^G + \frac{\sqrt{2\epsilon \ln 2}}{\sqrt{1 + \rho^2 + 2\rho^4}} X_3 + Z_3. \quad (300)$$

The above reconstruction yields the following distortion for the third frame

$$\mathbb{E}[\|X_3 - \hat{X}_3^G\|^2] = 2(1 - \sqrt{2\epsilon \ln 2(1 + \rho^2 + 2\rho^4)}) \sigma^2. \quad (301)$$

Finally, consider the reconstruction of the fourth frame as follows

$$\hat{X}_4^G = \lambda_1 \hat{X}_1^G + \lambda_2 \hat{X}_2^G + \lambda_3 \hat{X}_3^G + \lambda_4 X_4 + Z_4, \quad (302)$$

where  $\hat{X}_4^G \sim \mathcal{N}(0, \sigma^2)$ . The rate constraint of the fourth step implies that

$$(1 - \lambda_1^2 - \lambda_2^2 - \lambda_3^2 + O(\epsilon))(2\epsilon \ln 2 + O(\epsilon)) = \lambda_4^2(1 + O(\epsilon)). \quad (303)$$

The distortion can be written as follows

$$\begin{aligned} \mathbb{E}[\|X_4 - \hat{X}_4^G\|^2] &= 2\sigma^2 - 2\lambda_4\sigma^2 - 2\lambda_3\rho\tau_3\sigma^2 - 2\lambda_3\rho^2\tau_2\omega_2\sigma^2 - 2\lambda_3\rho^3\tau_2\omega_1\nu\sigma^2 \\ &\quad - 2\lambda_3\rho^3\tau_1\nu\sigma^2 - 2\lambda_2\rho^3\omega_1\nu\sigma^2 - 2\lambda_2\rho^2\omega_2\sigma^2 - 2\lambda_1\rho^3\nu \end{aligned} \quad (304)$$

$$\begin{aligned} &= 2\sigma^2 - 2\sqrt{(2\epsilon \ln 2)(1 - \lambda_1^2 - \lambda_2^2 - \lambda_3^2)}\sigma^2 - 2\lambda_3\rho\tau_3\sigma^2 \\ &\quad - 2\lambda_3\rho^2\tau_2\omega_2\sigma^2 - 2\lambda_3\rho^3\tau_2\omega_1\nu\sigma^2 - 2\lambda_3\rho^3\tau_1\nu\sigma^2 \\ &\quad - 2\lambda_2\rho^3\omega_1\nu\sigma^2 - 2\lambda_2\rho^2\omega_2\sigma^2 - 2\lambda_1\rho^3\nu + O(\epsilon). \end{aligned} \quad (305)$$

We take the derivative of the above expression with respect to  $\lambda_1$ ,  $\lambda_2$  and  $\lambda_3$  and we get

$$\frac{\lambda_1}{\sqrt{1 - \lambda_1^2 - \lambda_2^2 - \lambda_3^2}} = \rho^3 + O(\epsilon), \quad (306)$$

$$\frac{\lambda_2}{\sqrt{1 - \lambda_1^2 - \lambda_2^2 - \lambda_3^2}} = \rho^2\sqrt{1 + \rho^2} + O(\epsilon), \quad (307)$$

$$\frac{\lambda_3}{\sqrt{1 - \lambda_1^2 - \lambda_2^2 - \lambda_3^2}} = \rho\sqrt{1 + \rho^2 + 2\rho^4} + O(\epsilon). \quad (308)$$

Solving the above set of equations yields the following

$$\lambda_1 = \frac{\rho^3}{\sqrt{1 + \rho^2 + 2\rho^4 + 4\rho^6}} + O(\epsilon), \quad (309)$$

$$\lambda_2 = \frac{\rho^2\sqrt{1 + \rho^2}}{\sqrt{1 + \rho^2 + 2\rho^4 + 4\rho^6}} + O(\epsilon), \quad (310)$$

$$\lambda_3 = \frac{\rho\sqrt{1 + \rho^2 + 2\rho^4}}{\sqrt{1 + \rho^2 + 2\rho^4 + 4\rho^6}} + O(\epsilon). \quad (311)$$

Thus, considering the dominant terms, we can write

$$\begin{aligned} \hat{X}_4^G &= \frac{\rho^3}{\sqrt{1 + \rho^2 + 2\rho^4 + 4\rho^6}}\hat{X}_1^G + \frac{\rho^2\sqrt{1 + \rho^2}}{\sqrt{1 + \rho^2 + 2\rho^4 + 4\rho^6}}\hat{X}_2^G \\ &\quad + \frac{\rho\sqrt{1 + \rho^2 + 2\rho^4}}{\sqrt{1 + \rho^2 + 2\rho^4 + 4\rho^6}}\hat{X}_3^G + \frac{\sqrt{2\epsilon \ln 2}}{\sqrt{1 + \rho^2 + 2\rho^4 + 4\rho^6}}X_4 + Z_4. \end{aligned} \quad (312)$$

The distortion term then becomes:

$$\mathbb{E}[\|X_4 - \hat{X}_4^G\|^2] = 2(1 - \sqrt{2\epsilon \ln 2(1 + \rho^2 + 2\rho^4 + 4\rho^6)})\sigma^2. \quad (313)$$

Now, we use induction to derive the terms for  $T$  frames. Define

$$\Delta_{\text{FMD},j} := \sqrt{1 + \sum_{i=1}^{j-1} 2^{j-1-i}\rho^{2(j-i)}}, \quad j = 2, \dots, T \quad (314)$$

$$= \sqrt{1 + \rho^2 \frac{(2\rho^2)^{j-1} - 1}{2\rho^2 - 1}}. \quad (315)$$

Thus, we have

$$\hat{X}_j^G = \sum_{i=1}^{j-1} \frac{\Delta_{\text{FMD},i}\rho^{j-i}}{\Delta_{\text{FMD},j}}\hat{X}_i^G + \frac{\sqrt{2\epsilon \ln 2}}{\Delta_{\text{FMD},j}}X_j + Z_j, \quad j = 2, \dots, T, \quad (316)$$

where  $Z_j$  is a Gaussian random variable independent of  $(\hat{X}_1^G, \dots, \hat{X}_{j-1}^G, X_j)$  and its variance is such that  $\mathbb{E}[(\hat{X}_j^G)^2] = \sigma^2$ . The distortion is given by the following expression

$$D_{\text{FMD},j} = \mathbb{E}[\|X_j - \hat{X}_j^G\|^2] = 2(1 - \Delta_{\text{FMD},j}\sqrt{2\epsilon \ln 2})\sigma^2, \quad j = 2, \dots, T. \quad (317)$$

For the special case where  $\rho = 1$ , then the distortion simplifies to the following

$$\mathbb{E}[\|X_j - \hat{X}_j\|^2] = 2(1 - 2^{\frac{j-1}{2}} \sqrt{2\epsilon \ln 2})\sigma^2, \quad j = 2, \dots, T, \quad (318)$$

629 which shows an exponential decrease at each step.

630 *Distortion Analysis for 0-PLF-JD:*

In this case, the proof for  $T$  frames is similar to (254)–(261). Thus, we have

$$\hat{X}_j^G = \rho \hat{X}_{j-1}^G + \sqrt{(1 - \rho^2)2\epsilon \ln 2} X_j + Z_j, j = 2, \dots, T, \quad (319)$$

where  $Z_j$  is a Gaussian random variable independent of  $(\hat{X}_{j-1}^G, X_j)$  and its variance is such that  $\mathbb{E}[(\hat{X}_T^G)^2] = \sigma^2$ . It should be mentioned that preserving the correlation coefficients, e.g.,  $\mathbb{E}[\hat{X}_j^G \hat{X}_{j-1}^G] = \rho$ , needs some correction terms of  $O(\epsilon)$  as discussed in (257). However, as shown in (261), these correction terms do not contribute to dominant terms of distortion and hence, they can be ignored in the presentation of (319). Now, define

$$\Delta_{\text{JD},j} := \rho^{2(j-1)} + \sqrt{1 - \rho^2} \left( \sum_{i=0}^{j-2} \rho^{2i} \right), \quad j = 2, \dots, T, \quad (320)$$

and notice that

$$D_{\text{JD},j} := \mathbb{E}[\|X_j - \hat{X}_j\|^2] \quad (321)$$

$$= 2\sigma^2 - 2\mathbb{E}[X_j \hat{X}_j] \quad (322)$$

$$= 2\sigma^2 - 2\mathbb{E}[X_j(\rho \hat{X}_{j-1}^G + \sqrt{(1 - \rho^2)2\epsilon \ln 2} X_j)] \quad (323)$$

$$= 2\sigma^2 - 2\mathbb{E}[X_j(\rho^{j-1} X_1 + \sqrt{1 - \rho^2}(\rho^{j-2} X_2 + \dots + X_j))] \sqrt{2\epsilon \ln 2} \sigma^2 \quad (324)$$

$$= 2(1 - \Delta_{\text{JD},j} \sqrt{2\epsilon \ln 2})\sigma^2. \quad (325)$$

631 For the special case of  $\rho = 1$ , we get  $\Delta_{\text{JD},j} = 1$  which remains a constant across different steps. ■

## 632 H Universality Statement for Gauss-Markov Source Model

### 633 H.1 MMSE Representations for a Given Rate

For a given rate tuple  $\mathbf{R}$ , the minimum distortions achievable by MMSE representations are derived in [28, 37] and are given by

$$D_1^{\min} = \sigma_1^2 2^{-2R_1}, \quad (326)$$

$$D_2^{\min} = (\rho_1^2 \frac{\sigma_2^2}{\sigma_1^2} D_1^{\min} + \sigma_{N_1}^2) 2^{-2R_2}, \quad (327)$$

$$D_3^{\min} = (\rho_2^2 \frac{\sigma_3^2}{\sigma_2^2} D_2^{\min} + \sigma_{N_2}^2) 2^{-2R_3}, \quad (328)$$

where

$$\sigma_{N_1}^2 := (1 - \rho_1^2)\sigma_2^2, \quad (329)$$

$$\sigma_{N_2}^2 := (1 - \rho_2^2)\sigma_3^2. \quad (330)$$

634 The above distortions are achieved by the following optimal reconstructions  $\hat{X}_r$  given in [28]. Notice  
635 that the MMSE representation is  $\mathbf{X}_r^{\text{RD}} = \hat{X}_r$ , i.e., the functions  $\eta_1(\cdot)$  and  $\eta_2(\cdot, \cdot)$  of iRDP region  $\mathcal{C}_{\text{RDP}}$   
636 (Definition 4) are identity functions (this statement follows from Theorem 5). Now, we choose the  
637 reconstruction  $\hat{X}_r$  in the following.

The reconstruction  $\hat{X}_{r,1}$  is chosen such that  $\hat{X}_{r,1} \rightarrow X_1 \rightarrow (X_2, X_3)$  holds a Markov chain and

$$X_1 = \hat{X}_{r,1} + Z_1, \quad (331)$$

where  $\hat{X}_{r,1} \sim \mathcal{N}(0, \sigma_1^2 - D_1^{\min})$  and  $Z_1 \sim \mathcal{N}(0, D_1^{\min})$  are independent random variables. Then, the reconstruction  $\hat{X}_{r,2}$  is chosen as follows. Let

$$W_2 := \rho_1 \frac{\sigma_2}{\sigma_1} Z_1 + N_1, \quad (332)$$

which is the innovation from  $\hat{X}_{r,1}$  to  $X_2$ . Now, we find the random variables  $\hat{W}_2$  and  $Z_2$  such that

$$W_2 = \hat{W}_2 + Z_2, \quad (333)$$

where  $\hat{W}_2 \sim \mathcal{N}(0, \rho_1^2 \frac{\sigma_2^2}{\sigma_1^2} D_1^{\min} + \sigma_{N_1}^2 - D_2^{\min})$  and  $Z_2 \sim \mathcal{N}(0, D_2^{\min})$  are independent from each other, and the Markov chain  $\hat{W}_2 \rightarrow (X_2, \hat{X}_{r,1}) \rightarrow (X_1, X_3)$  holds. Now, define

$$\hat{X}_{r,2} := \rho_1 \frac{\sigma_2}{\sigma_1} \hat{X}_{r,1} + \hat{W}_2. \quad (334)$$

Finally, we choose the reconstruction  $\hat{X}_{r,3}$  as follows. Let

$$W_3 := \rho_2 \frac{\sigma_3}{\sigma_2} Z_2 + N_2, \quad (335)$$

which is the innovation from  $\hat{X}_{r,2}$  to  $X_3$ . Now, we find random variables  $\hat{W}_3$  and  $Z_3$  such that

$$W_3 = \hat{W}_3 + Z_3, \quad (336)$$

where  $\hat{W}_3 \sim \mathcal{N}(0, \rho_2^2 \frac{\sigma_3^2}{\sigma_2^2} D_2^{\min} + \sigma_{N_2}^2 - D_3^{\min})$  and  $Z_3 \sim \mathcal{N}(0, D_3^{\min})$  are independent from each other, and the Markov chain  $\hat{W}_3 \rightarrow (X_3, \hat{X}_{r,1}, \hat{X}_{r,2}) \rightarrow (X_1, X_2)$  holds. Now, define

$$\hat{X}_{r,3} := \rho_1 \frac{\sigma_3}{\sigma_2} \hat{X}_{r,2} + \hat{W}_3. \quad (337)$$

Thus, the optimal reconstruction  $\hat{X}_r$  is chosen and it satisfies the rate constraint  $R$ .

## H.2 Universality Statement

**Theorem 7** For a given rate tuple  $R$  with strictly positive components, let the MMSE representation be denoted as  $X_r^{RD} = (X_{r,1}^{RD}, X_{r,2}^{RD}, X_{r,3}^{RD})$ . Let  $(D, P) \in \mathcal{DP}(R)$  and let  $\hat{X} = (\hat{X}_1, \hat{X}_2, \hat{X}_3)$  be the corresponding reconstruction achieving it. Then there exist  $\kappa_1, \theta_1, \theta_2, \psi_1, \psi_2$  and  $\psi_3$  and noise variables  $(Z_1, Z_2, Z_3)$  independent of  $(X_{r,1}^{RD}, X_{r,2}^{RD}, X_{r,3}^{RD})$ , which satisfy the following

$$\hat{X}_1 = \kappa_1 X_{r,1}^{RD} + Z_1, \quad \hat{X}_2 = \theta_1 X_{r,1}^{RD} + \theta_2 X_{r,2}^{RD} + Z_2, \quad \hat{X}_3 = \psi_1 X_{r,1}^{RD} + \psi_2 X_{r,2}^{RD} + \psi_3 \hat{X}_{r,3}^{RD} + Z_3.$$

For a given positive rate tuple  $R$ , let the MMSE representation  $X_r^{RD}$  be in the set  $\mathcal{P}^{RD}(R)$ . Also, let  $(D, P) \in \mathcal{DP}(R)$  and  $X_r, \hat{X}$  be the corresponding representation and reconstruction achieving it.

*Proof:* First, notice that according to the proof of Theorem 5 for the Gauss-Markov source model, one can set  $\hat{X} = X_r$  in iRDP region of  $\mathcal{C}_{RDP}$ , without loss of optimality. So, in the following proof, the reconstruction  $X_r$  and representation  $\hat{X}$  are used interchangeably, in some places.

We show the following statement. If

$$R_1 \geq I(X_1; X_{r,1}), \quad (338)$$

$$R_2 \geq I(X_2; X_{r,2} | X_{r,1}), \quad (339)$$

$$R_3 \geq I(X_3; X_{r,3} | X_{r,1}, X_{r,2}), \quad (340)$$

then, there exist  $\kappa_1, \theta_1, \theta_2, \psi_1, \psi_2$  and  $\psi_3$  and noise variables  $Z_1, Z_2, Z_3$  independent of  $X_{r,1}^{RD}, (X_{r,1}^{RD}, X_{r,2}^{RD}), (X_{r,1}^{RD}, X_{r,2}^{RD}, X_{r,3}^{RD})$ , respectively, which satisfy the following

$$\hat{X}_1 = \kappa_1 X_{r,1}^{RD} + Z_1, \quad (341)$$

$$\hat{X}_2 = \theta_1 X_{r,1}^{RD} + \theta_2 X_{r,2}^{RD} + Z_2, \quad (342)$$

$$\hat{X}_3 = \psi_1 X_{r,1}^{RD} + \psi_2 X_{r,2}^{RD} + \psi_3 \hat{X}_{r,3}^{RD} + Z_3. \quad (343)$$

If (338)–(340) are satisfied with equality, then the noise random variables in (341)–(343) do not exist and a linear combination is sufficient for converting  $(X_{r,1}^{RD}, X_{r,2}^{RD}, X_{r,3}^{RD})$  to  $(\hat{X}_1, \hat{X}_2, \hat{X}_3)$ .

First, we prove the statement when all of inequalities in (338)–(340) hold with “equality”. We provide the proof for  $T = 2$  frames. The extension to arbitrary number of frames is straightforward. To that end, we first prove the following two lemmas.

**Lemma 2** Without loss of optimality, the reconstruction of the first step  $\hat{X}_1$  satisfies the following

$$\gamma_1 \hat{X}_1 = W_1, \quad (344)$$

where

$$\gamma_1 := \frac{\mathbb{E}[X_1 \hat{X}_1]}{\sigma_{\hat{X}_1}^2}, \quad (345)$$

650 and  $W_1$  is a Gaussian random variable that its statistics do not depend on the pair  $(D_1, P_1)$ .

*Proof:* According to Theorem 5, we know that  $(X_1, \hat{X}_1)$  are jointly Gaussian. So, we can write  $X_1$  as follows

$$X_1 = \gamma_1 \hat{X}_1 + T_1, \quad (346)$$

where  $T_1$  is a Gaussian random variable independent of  $\hat{X}_1$  with a constant variance  $\sigma_1^2 2^{-2R_1}$ . Notice that (346) can be written as follows

$$\hat{X}_1 = \alpha_1 (X_1 + Q), \quad (347)$$

where  $Q$  is a Gaussian random variable independent of  $X_1$  with a zero-mean and variance  $\frac{\sigma_1^2 2^{-2R_1}}{1 - 2^{-2R_1}}$  and

$$\alpha_1 := \frac{1}{\gamma_1} (1 - 2^{-2R_1}). \quad (348)$$

From (347), we get

$$\gamma_1 \hat{X}_1 = (1 - 2^{-2R_1})(X_1 + Q). \quad (349)$$

651 Now, defining  $W_1 := (1 - 2^{-2R_1})(X_1 + Q)$  yields the desired result. ■

**Lemma 3** Without loss of optimality, the reconstructions of the first and second steps  $(\hat{X}_1, \hat{X}_2)$  satisfy the following

$$\lambda_1 \hat{X}_1 + \lambda_2 \hat{X}_2 = W_2, \quad (350)$$

where

$$\lambda_1 := \frac{\rho_1 \mathbb{E}[X_1 \hat{X}_1] \hat{\sigma}_{\hat{X}_2}^2 - \mathbb{E}[\hat{X}_1 \hat{X}_2] \mathbb{E}[X_2 \hat{X}_2]}{\hat{\sigma}_{\hat{X}_1}^2 \hat{\sigma}_{\hat{X}_2}^2 - \mathbb{E}^2[\hat{X}_1 \hat{X}_2]}, \quad (351)$$

$$\lambda_2 := \frac{\rho_1 \mathbb{E}[X_1 \hat{X}_1] \mathbb{E}[\hat{X}_1 \hat{X}_2] - \hat{\sigma}_{\hat{X}_1}^2 \mathbb{E}[X_2 \hat{X}_2]}{\hat{\sigma}_{\hat{X}_1}^2 \hat{\sigma}_{\hat{X}_2}^2 - \mathbb{E}^2[\hat{X}_1 \hat{X}_2]}, \quad (352)$$

652 and  $W_2$  is a Gaussian random variable that its statistics do not depend on the pairs  $(D_1, P_1)$  and  
653  $(D_2, P_2)$ .

*Proof:* According to Theorem 5, we know that  $(X_1, X_2, \hat{X}_1, \hat{X}_2)$  are jointly Gaussian. So, we can write  $X_2$  as follows

$$X_2 = \lambda_1 \hat{X}_1 + \lambda_2 \hat{X}_2 + T_2, \quad (353)$$

where  $T_2$  is a Gaussian random variable independent of  $(\hat{X}_1, \hat{X}_2)$  with a constant variance of  $\sigma_{X_2|\hat{X}_1}^2 2^{-2R_2}$  where

$$\sigma_{X_2|\hat{X}_1}^2 := \frac{1}{2} \log \left( \rho_1^2 \sigma_1^2 2^{-2R_1} + 2^{2H(N_1)} \right). \quad (354)$$

Notice that (353) can be written as follows

$$\lambda_1 \hat{X}_1 + \lambda_2 \hat{X}_2 = (1 - 2^{-2R_2})(X_2 + Q'), \quad (355)$$

654 where  $Q'$  is a Gaussian random variable independent of  $X_2$  with a zero-mean and variance  
655  $\frac{\sigma_{X_2|\hat{X}_1}^2 2^{-2R_2}}{1 - 2^{-2R_2}}$ . Defining  $W_2 := (1 - 2^{-2R_2})(X_2 + Q')$  yields the desired result. ■

Now, we proceed with the proof of the theorem. According to Lemma 2, there exist real  $\gamma_1$  and  $\gamma'_1$  such that

$$\gamma_1 \hat{X}_1 = \gamma'_1 X_{r,1}^{\text{RD}}. \quad (356)$$

Define

$$\kappa_1 := \frac{\gamma'_1}{\gamma_1}. \quad (357)$$

Then, according to Lemma 3, there exist  $\lambda_1, \lambda_2, \lambda'_1$  and  $\lambda'_2$  such that

$$\lambda_1 \hat{X}_1 + \lambda_2 \hat{X}_2 = \lambda'_1 X_{r,1}^{\text{RD}} + \lambda'_2 X_{r,2}^{\text{RD}}. \quad (358)$$

The above equation can be written as

$$\hat{X}_2 = \frac{\lambda'_1 - \lambda_1 \kappa_1}{\lambda_2} X_{r,1}^{\text{RD}} + \frac{\lambda'_2}{\lambda_2} X_{r,2}^{\text{RD}} \quad (359)$$

$$:= \theta_1 X_{r,1}^{\text{RD}} + \theta_2 X_{r,2}^{\text{RD}}. \quad (360)$$

656 A similar justification holds for the third frame.

657 Next, we prove the statement when at least one of the rate constraints in (338)–(340) hold with strict  
658 inequality. In the following, we construct new reconstructions  $(\hat{X}'_1, \hat{X}'_2)$  based on  $(\hat{X}_1, \hat{X}_2)$  such  
659 that they satisfy the rate constraints  $(R_1, R_2)$  with equality. Then, we will be able to apply the two  
660 lemmas we proved to show that  $(\hat{X}'_1, \hat{X}'_2)$  are linearly related to MMSE reconstructions  $(X_{r,1}^{\text{RD}}, X_{r,2}^{\text{RD}})$ .

661 Construction of  $\hat{X}'_1$ :

Now, let

$$\hat{R}_1 := I(X_1; \hat{X}_1), \quad (361)$$

where  $\hat{R}_1 \leq R_1$ . Also, recall that

$$R_1 = I(X_1; X_{r,1}^{\text{RD}}). \quad (362)$$

Now, let  $\hat{X}'_1$  such that  $\hat{X}'_1 \rightarrow X_{r,1}^{\text{RD}} \rightarrow X_1$  holds and

$$\hat{X}'_1 = X_{r,1}^{\text{RD}} + W_1, \quad (363)$$

where  $W_1 \sim \mathcal{N}(0, \nu_1^2)$  independent of  $\hat{X}_1$  and  $\nu_1^2$  will be determined in the following. Notice that  $I(X_1; \hat{X}'_1)$  is a monotonically decreasing function of  $\nu_1^2$ . So, one choose  $\nu_1^2$  such that

$$I(\hat{X}'_1; X_1) = I(X_1; \hat{X}_1) = \hat{R}_1. \quad (364)$$

Now, according to Lemma 2, since  $\hat{X}'_1$  and  $\hat{X}_1$  have the same rates, there exists a coefficient  $\kappa'_1$  such that

$$\hat{X}_1 = \kappa'_1 \hat{X}'_1 \quad (365)$$

$$= \kappa'_1 X_{r,1}^{\text{RD}} + \kappa'_1 W_1. \quad (366)$$

Now, define  $Z_1 := \kappa'_1 W_1$  and notice that

$$\hat{X}_1 = \kappa'_1 X_{r,1}^{\text{RD}} + Z_1. \quad (367)$$

662 Construction of  $\hat{X}'_2$ :

Next, consider the second step. Define

$$\hat{R}_2 := I(X_2; \hat{X}_2 | \hat{X}_1), \quad (368)$$

where  $\hat{R}_2 \leq R_2$ . Also, recall that

$$R_2 = I(X_2; X_{r,2}^{\text{RD}} | X_{r,1}^{\text{RD}}). \quad (369)$$

Define  $\tilde{X}_2 := \mathbb{E}[X_2 | X_{r,1}^{\text{RD}}, X_{r,2}^{\text{RD}}]$  to be the MMSE reconstruction and consider that

$$R_2 = I(X_2; X_{r,2}^{\text{RD}} | X_{r,1}^{\text{RD}}) \quad (370)$$

$$= I(X_2; \tilde{X}_2 | X_{r,1}^{\text{RD}}), \quad (371)$$

663 where the last equality follows because both Markov chains  $X_2 \rightarrow (X_{r,1}^{\text{RD}}, X_{r,2}^{\text{RD}}) \rightarrow \tilde{X}_2$  and  $X_2 \rightarrow$   
 664  $\tilde{X}_2 \rightarrow (X_{r,1}^{\text{RD}}, X_{r,2}^{\text{RD}})$  hold where the latter one is satisfied for Gaussian random variables for which  
 665 we can write  $X_2 = \mathbb{E}[X_2|X_{r,1}, X_{r,2}] + W'$  such that  $W'$  is independent of  $(X_{r,1}^{\text{RD}}, X_{r,2}^{\text{RD}})$ .

Now, we show that  $I(X_2; \tilde{X}_2|X_{r,1}^{\text{RD}}) \leq I(X_2; \tilde{X}_2|\hat{X}_1')$ . This is justified in the following

$$I(X_2; \tilde{X}_2|\hat{X}_1') = I(X_2; \tilde{X}_2|X_{r,1}^{\text{RD}} + W_1) \quad (372)$$

$$= H(X_2|X_{r,1}^{\text{RD}} + W_1) - H(X_2|\tilde{X}_2, X_{r,1}^{\text{RD}} + W_1) \quad (373)$$

$$\geq H(X_2|X_{r,1}^{\text{RD}} + W_1, W_1) - H(X_2|\tilde{X}_2, X_{r,1}^{\text{RD}} + W_1) \quad (374)$$

$$= H(X_2|X_{r,1}^{\text{RD}}, W_1) - H(X_2|\tilde{X}_2, X_{r,1}^{\text{RD}} + W_1) \quad (375)$$

$$\geq H(X_2|X_{r,1}^{\text{RD}}, W_1) - H(X_2|\tilde{X}_2) \quad (376)$$

$$= H(X_2|X_{r,1}^{\text{RD}}) - H(X_2|\tilde{X}_2) \quad (377)$$

$$= H(X_2|X_{r,1}^{\text{RD}}) - H(X_2|\tilde{X}_2, X_{r,1}^{\text{RD}}) \quad (378)$$

$$= I(X_2; \tilde{X}_2|X_{r,1}^{\text{RD}}), \quad (379)$$

666 where (377) follows because  $W_1$  is independent of  $(X_2, X_{r,1}^{\text{RD}})$  and (378) follows from the Markov  
 667 chain  $X_2 \rightarrow \tilde{X}_2 \rightarrow X_{r,1}^{\text{RD}}$ .

Define

$$R'_2 := I(X_2; \tilde{X}_2|\hat{X}_1'), \quad (380)$$

and consider the fact that  $R'_2 \geq R_2$ . Now, we introduce  $\hat{X}'_2$  such that  $\hat{X}'_2 \rightarrow (\tilde{X}_2, \hat{X}'_1) \rightarrow X_2$  forms a Markov chain and

$$\hat{X}'_2 = \tilde{X}_2 + \hat{X}'_1 + W_2, \quad (381)$$

where  $W_2 \sim \mathcal{N}(0, \nu_2^2)$  independent of  $(\tilde{X}_2, \hat{X}'_1)$  and  $\nu_2^2$  will be determined in the following. Since  $I(X_2; \hat{X}'_2|\hat{X}'_1)$  is a monotonically decreasing function of  $\nu_2^2$ , we can choose  $\nu_2^2$  such that

$$I(X_2; \hat{X}'_2|\hat{X}'_1) = I(X_2; \hat{X}_2|\hat{X}_1) = \hat{R}_2. \quad (382)$$

Then, according to Lemma 3, there exist  $\lambda'_1, \lambda'_2, \hat{\lambda}_1$  and  $\hat{\lambda}_2$  such that

$$\lambda'_1 \hat{X}'_1 + \lambda'_2 \hat{X}'_2 = \hat{\lambda}_1 \hat{X}_1 + \hat{\lambda}_2 \hat{X}_2. \quad (383)$$

Plugging (363), (367) and (381) into the above expression and letting  $\tilde{X}_2 = \alpha X_{r,1}^{\text{RD}} + \beta X_{r,2}^{\text{RD}}$  for some  $\alpha, \beta$ , we get

$$(\lambda'_1 + (1 + \alpha)\lambda'_2 - \hat{\lambda}_1 \kappa') X_{r,1}^{\text{RD}} + \lambda'_2 \beta X_{r,2}^{\text{RD}} + (\lambda'_1 + \lambda'_2) W_1 + \lambda'_2 W_2 - \hat{\lambda}_1 Z_1 = \hat{\lambda}_2 \hat{X}_2. \quad (384)$$

Now define

$$\theta_1 := \frac{\lambda'_1 + (1 + \alpha)\lambda'_2 - \hat{\lambda}_1 \kappa'}{\hat{\lambda}_2}, \quad (385)$$

$$\theta_2 := \frac{\lambda'_2 \beta}{\hat{\lambda}_2}, \quad (386)$$

$$Z_2 := \frac{(\lambda'_1 + \lambda'_2)}{\hat{\lambda}_2} W_1 + \frac{\lambda'_2}{\hat{\lambda}_2} W_2 - \frac{\hat{\lambda}_1}{\hat{\lambda}_2} Z_1. \quad (387)$$

Thus, we have

$$\hat{X}_2 = \theta_1 X_{r,1}^{\text{RD}} + \theta_2 X_{r,2}^{\text{RD}} + Z_2. \quad (388)$$

668 Notice that the above proof only uses the information about reconstructions of the operating points in  
 669 DP-tradeoff and it does not depend on the choice of PLF. So, it holds for both PLF-JD and PLF-FMD.  
 670 This concludes the proof. ■

### 671 H.3 Gaussian Example

Assume that the sources are symmetric in the sense that  $\sigma_1^2 = \sigma_2^2 = \sigma_3^2 = 1$ ,  $\rho_1 = \rho_2 = \rho_3 := \rho$  for some  $0 < \rho \leq 1$ . Also, suppose that the perception thresholds are symmetric, i.e.,  $P_1 = P_2 = P_3 := P$  for some  $0 < P \leq 1$ . We choose the rate tuple  $\mathbf{R}$  such that the minimum distortions  $D_j^{\min} = D$  for  $j \in \{1, 2, 3\}$ . According to Appendix H.1, such rates are given by

$$R_1 = \frac{1}{2} \log \frac{1}{D}, \quad (389)$$

$$R_2 = \frac{1}{2} \log \frac{\rho^2 D + (1 - \rho)}{D}, \quad (390)$$

$$R_3 = \frac{1}{2} \log \frac{\rho^2 D + (1 - \rho^2)}{D}. \quad (391)$$

The covariance matrix of the MMSE representations  $\text{cov}(X_{r,1}^{\text{RD}}, X_{r,2}^{\text{RD}}, X_{r,3}^{\text{RD}})$  is given by  $(1 - D)\Sigma$  where

$$\Sigma := \begin{pmatrix} 1 & \rho & \rho^2 \\ \rho & 1 & \rho \\ \rho^2 & \rho & 1 \end{pmatrix}. \quad (392)$$

672 If we introduce the 0-PLF while keeping the rates as those of MMSE reconstructions, it can be  
 673 shown that the optimal distortions are all equal to  $D_1 = D_2 = D_3 = 2 - 2\sqrt{1 - D}$ . Denote the  
 674 reconstructions by  $(\hat{X}_{D_1}^0, \hat{X}_{D_2}^0, \hat{X}_{D_3}^0)$  and notice that the covariance matrix of the reconstructions is  
 675 equal to that of the sources and is given by  $\Sigma$ . Thus, the covariance matrix of  $(X_{r,1}^{\text{RD}}, X_{r,2}^{\text{RD}}, X_{r,3}^{\text{RD}})$  is  
 676  $(1 - D)$  times the covariance matrix of  $(\hat{X}_{D_1}^0, \hat{X}_{D_2}^0, \hat{X}_{D_3}^0)$ . So, the reconstructions  $(X_{r,1}^{\text{RD}}, X_{r,2}^{\text{RD}}, X_{r,3}^{\text{RD}})$   
 677 and  $(\hat{X}_{D_1}^0, \hat{X}_{D_2}^0, \hat{X}_{D_3}^0)$  can be transformed to each other by the scaling factor  $\frac{1}{\sqrt{1 - D}}$ . This inspires  
 678 the idea that reconstructions corresponding to different tuples  $(D, P)$  are linearly related to those of  
 679 MMSE representations which is the essence of the following Theorem 6. Moreover, both PLFs either  
 680 based on FMD or JD perform similarly in this example since individually scaling the reconstruction  
 681 of each frame finally ends up in matching the covariance matrix of all frames.

## 682 I Justification of low-rate regime for Moving MNSIT

683 In the MovingMNIST dataset, the digit in I-frame is generated uniformly across the  $32 \times 32$  center  
 684 region in a  $64 \times 64$  image, meaning that  $\log(32 \times 32) = 10$  bits are required to localize the digits and any  
 685 lower rate would result in much less correlated reconstructions. As such, one can consider  $R_1 = 12$  bits  
 686 (2 extra bits for content and style) as a low rate. For P-frames, the movement is uniformly constrained  
 687 within a  $10 \times 10$  region so any rate  $R_2 \leq \log_2(10 \times 10) = 6.6$  bits (excluding residual compensation)  
 688 can be considered a low rate.

## 689 J Experiment Details

### 690 J.1 Training Setup and Overview

691 Our compression architecture is built on the scale-space flow model [32], which allows end-to-end  
 692 training without relying on pre-trained optical flow estimators. For better compression efficiency,  
 693 we replace the residual compression module with the conditioning one [33]. In the following, we  
 694 will interchangeably refer  $X_1$  as the I-frame and subsequent ones as P-frames. The annotation for  
 695 the encoder, decoder, and critic (discriminator) will be referred to as  $f, g$ , and  $h$  respectively and  
 696 their specific functionality (e.g motion compression, joint perception critic) will be described within  
 697 context through a subscript/superscript.

698 *Distortion and Perception Measurement:* We follow the setup in prior works [16, 21] for distortion  
 699 and perception measurement. Specifically, we use MSE loss  $\mathbb{E}[||X - \hat{X}||^2]$  as a distortion metric and  
 700 Wasserstein-1 distance as a perception metric, which can be estimated through the WGAN critics  
 701 (following the Kantorovich-Rubinstein duality). For the marginal perception metric, we optimize

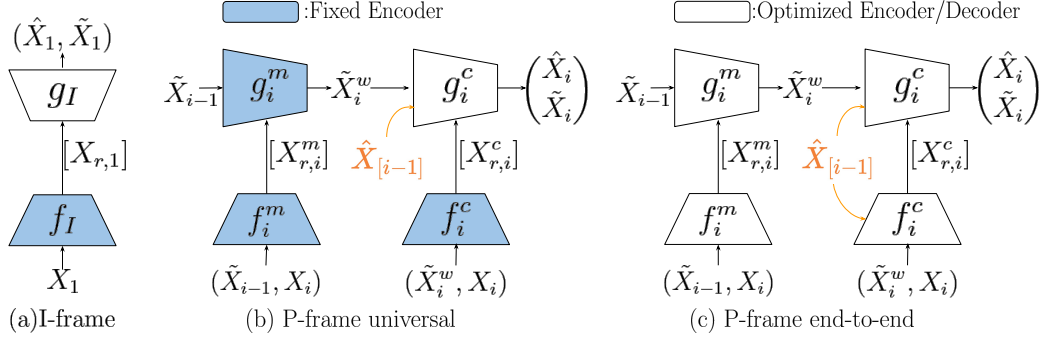

**Figure 6:** Compression diagram for (a) I-frame (b) P-frame with universal representation and (c) P-frame with optimized representation. For simplicity, we do not show the shared randomness  $K$ .

our critics  $h_m$  to classify between original image  $X$  and synthetic ones  $\hat{X}$ . This will then allow us to measure  $W_1(P_X, P_{\hat{X}})$  since:

$$W_1(P_X, P_{\hat{X}}) = \sup_{h_m \in \mathcal{F}} \mathbb{E}[h_m(X)] - \mathbb{E}[h_m(\hat{X})] \quad (393)$$

where  $\mathcal{F}$  is a set of all bounded 1-Lipschitz functions. Similarly, the joint perception metric is realized through  $W_1(P_{X_1 \dots X_j}, P_{\hat{X}_1 \dots \hat{X}_j})$  by training a critic  $h_j$  that classifies between synthetic and authentic sequences:

$$W_1(P_{X_1 \dots X_j}, P_{\hat{X}_1 \dots \hat{X}_j}) = \sup_{h_j \in \mathcal{F}} \mathbb{E}[h_j(X_1, \dots, X_j)] - \mathbb{E}[h_j(\hat{X}_1, \dots, \hat{X}_j)] \quad (394)$$

In practice, the set of 1-Lipschitz functions is limited by the neural network architecture. Also, although our analysis employs the Wasserstein-2 distance as a perception metric, it is worth noting that the ideal reconstructions (0-PLF) for this metric and the one used in our study should be identical.

*I-frame Compressor:* We compress I-frames in a similar fashion as previous works [16, 21]. Our encoder  $f_I$  and decoder  $g_I$  in Figure 6a contain a series of convolution operations and we control the rate  $R_1$  by varying the dimension and quantization level in the bottleneck. The model utilizes common randomness through the dithered quantization operation. For a given rate  $R_1$ , we vary the amount of DP tradeoff by controlling the hyper-parameter  $\lambda_i^{\text{marginal}}$  in the following minimization objective  $\mathcal{L}_1$ :

$$\mathcal{L}_1 = \mathbb{E}[\|X_1 - \hat{X}_1\|^2] + \lambda_i^{\text{marginal}} W_1(P_{X_1}, P_{\hat{X}_1}) \quad (395)$$

Following the results from Zhang et al. [16], we fix the encoder after optimizing the encoder-decoder pair for MSE representations. We then fix the encoder and train another decoder to obtain the optimal reconstruction with perfect perception, i.e.,  $W_1(P_X, P_{\hat{X}}) \approx 0$ . We will leverage these universal representation results to compress P-frames (both end-to-end and universal).

*P-frame Compressor:* We describe the loss functions before explaining our architectures. Given previous reconstructions  $\hat{X}_{[i-1]} := \{\hat{X}_1, \hat{X}_2, \dots, \hat{X}_{i-1}\}$ , one can adjust the distortion-joint perception tradeoff by controlling the hyper-parameter  $\lambda_i^{\text{joint}}$  in the following objective  $\mathcal{L}_i$ .

$$\mathcal{L}_i^{\text{joint}} = \mathbb{E}[\|X_i - \hat{X}_i\|^2] + \lambda_i^{\text{joint}} W_1(P_{X_{[i]}}, P_{\hat{X}_{[i]}}) \quad (396)$$

Note that in order to achieve 0-PLF-JD, previous reconstructions  $\hat{X}_{[i-1]}$  must also achieve 0-PLF-JD, since it is impossible to reconstruct such  $\hat{X}_i$  if the previous  $\hat{X}_{[i-1]}$  are not temporally consistent<sup>2</sup>. For the FMD metric, we use the loss function in [395].

In the *universal model* in Figure 6b, the motion encoder  $f_i^m$  compresses and sends the quantized flow fields  $[X_{r,i}^m]$  between the MMSE reconstruction  $\tilde{X}_{i-1}$  and  $X_i$ . Given  $[X_{r,i}^m]$ , the flow decoder and warping module  $g_i^m$  will transform  $\tilde{X}_{i-1}$  into  $\tilde{X}_i^w$  (predicted frame). We use  $f_i^c$  to compress the

<sup>2</sup>This follows from the inequality:  $W_2^2(P_{X_1, X_2}, P_{\hat{X}_1, \hat{X}_2}) \geq W_2^2(P_{X_1}, P_{\hat{X}_1}) + W_2^2(P_{X_2}, P_{\hat{X}_2})$

residual information  $[X_{r,i}^c]$  between  $X_i$  and  $\tilde{X}_i^w$ <sup>3</sup>, which will be decoded by  $g_i^c$ . We note that for MMSE representation,  $g_i^c$  only requires  $\tilde{X}_i^w$  as a conditional input while an additional conditioning input  $\hat{X}_{[i-1]}$  is required when perceptual optimization is involved. Together,  $f_i^m, g_i^m, f_i^c$ , and  $g_i^c$  are optimized for MMSE reconstructions. To train for different DP tradeoffs, we fix  $f_i^m, g_i^m, f_i^c$  and adapt the new decoder  $\hat{g}_i^c$  (conditioning on  $\tilde{X}_i^w, \hat{X}_{[i-1]}$ ). We note that fixing  $g_i^m$  for universal representation is essential since  $[X_{r,i}^c]$  is dependent on the outputs  $\tilde{X}_i^w$  of  $g_i^m$ .

In the *end-to-end model* in Figure 6c, we use an MMSE representation to estimate the motion vector, as in the case of the universal model. The only difference is that the encoder  $f_i^c$  also uses previous  $\hat{X}_i$  and the encoders will be jointly trained with the decoders.

## J.2 Networks Architecture

In this section, we describe the network architecture for universal and end-to-end P-frame compressor models.<sup>4</sup> In the architecture layout, we denote BN2D and SN for the *Batchnorm2D* and *Spectral Normalization* layers. Convolutional and transposed convolutional layer are denoted as “conv” and “upconv” respectively, which is accompanied by number of filters, kernel size, stride, and padding.

*Motion Encoder and Decoder.* The universal and optimized end-to-end model shares the same architecture for the motion encoder and decoder. ( $f_i^m$  and  $g_i^m$  respectively). We follow the original implementations [32] and present the convolutional architecture in Table 3. Different from the original implementation, however, we replace the last layer with dithered quantization layer (as in [16]) in our implementation. The output dimension of the motion encoder is denoted as  $d_m$ .

**Table 3:** Motion Encoder  $f_i^m$  and Decoder  $g_i^m$ .

| (a) Encoder $f_i^m$                                     | (b) Decoder $g_i^m$             |
|---------------------------------------------------------|---------------------------------|
| Input- $64 \times 64 \times (2 \times \text{channels})$ | Input- $d_m$                    |
| conv (64:5:2:0), BN2D, l-ReLU                           | upconv (64:4:1:0), BN2D, l-ReLU |
| conv (64:5:2:0), BN2D, l-ReLU                           | upconv (64:5:2:0), BN2D, l-ReLU |
| conv (64:5:2:0), BN2D, l-ReLU                           | upconv (64:5:2:0), BN2D, l-ReLU |
| conv (64:5:2:0), BN2D, l-ReLU                           | upconv (64:5:2:0), BN2D, l-ReLU |
| conv ( $d_m$ :4:2:0), BN2D                              | upconv (3:5:2:0), BN2D          |
| Quantizer                                               |                                 |

*Residual Encoder and Decoder.* The architecture of the conditional residual encoder is shown in Table 4a, where we stack multiple frames along their channel dimension as an input. As described previously, in the residual encoder, the universal model requires only  $X_i, \tilde{X}_i^w$  while the end-to-end model will receive  $X_i, \tilde{X}_i^w$  and  $\hat{X}_{[i-1]}$ . We denote the output dimension of this residual encoder as  $d_r$ . In the decoding part, the decoder will first condition all the previous reconstructions  $\hat{X}_{[i-1]}$  by projecting them into an embedding vector of size 192 (conditioning module in Table 4b). Then we concatenate this vector with the output of  $f_i^r$ . The concatenated vector will be fed into the decoder (Table 4c) to produce the reconstruction  $\hat{X}_i$ .

*FMD and JD Critics.* For the video critics, our PLF-JD critic architecture is inspired by the work of Kwon and Park [40], where we concatenate frames sequentially along their channel dimensions. For both PLF-FMD and PLF-JD critics, we add spectral normalization layers for better convergence. Their architecture is shown in Table 5.

*Rate and output dimension* The rate  $R$  is computed by  $\log_2(d_{enc} \times L)$ , where  $L$  is the number of quantization levels and  $d_{enc} = d_r + d_m$ . Table 6 provides configurations of the rate,  $d_m, d_r$ , and  $L$  in the experiment.

*Training Details:* We use a batch size of 64, RMSProp optimizer with a learning rate of  $5 \times 10^{-5}$ , and train each model with 360 epochs, where the training set contains 60000 images. To accelerate

<sup>3</sup>Here, we use conditioning [33] instead of sending  $X_i - \tilde{X}_{i-1}^w$  as in the original work [32].

<sup>4</sup>For the I-frame compressor, we follow the DCGAN implementation by Denton et al [39], adding the dithered quantization layer in the encoder’s last layer ([https://github.com/edenton/svg/blob/master/models/dcgan\\_64.py](https://github.com/edenton/svg/blob/master/models/dcgan_64.py))

**Table 4:** Residual Encoder, Conditional Module, and Residual Decoder.

**(a)Encoder  $f_i^c$**

| Input                         |
|-------------------------------|
| conv (64:5:2:0), BN2D, l-ReLU |
| conv ( $d_r$ :4:1:0), BN2D    |
| Quantizer                     |

**(b)Conditional Module**

| Input                         |
|-------------------------------|
| conv (64:5:2:0), BN2D, l-ReLU |
| conv (192:4:1:0), BN2D        |

**(c)Decoder**

| Input-( $d_r+192$ )                   |
|---------------------------------------|
| upconv (64:4:1:0) uc4s1, BN2D, l-ReLU |
| upconv (64:5:2:0), BN2D, l-ReLU       |
| upconv (64:5:2:0), BN2D, l-ReLU       |
| upconv (64:5:2:0), BN2D, l-ReLU       |
| upconv (channels:5:2:0), BN2D         |

**Table 5:** PLF-FMD and PLF-JD critic for frame  $i$ .

| (a) PLF-FMD Critic                           |  | (b) PLF-JD Critic                                       |  |
|----------------------------------------------|--|---------------------------------------------------------|--|
| Input- $64 \times 64 \times \text{channels}$ |  | Input- $64 \times 64 \times (i \times \text{channels})$ |  |
| SN, conv (64:4:2:1), l-ReLU                  |  | SN, conv (64:4:2:1), l-ReLU                             |  |
| SN, conv (128:4:2:1), l-ReLU                 |  | SN, conv (128:4:2:1), l-ReLU                            |  |
| SN, conv (256:4:2:1), l-ReLU                 |  | SN, conv (256:4:2:1), l-ReLU                            |  |
| conv (512:4:2:1), l-ReLU                     |  | conv (512:4:2:1), l-ReLU                                |  |
| Linear                                       |  | Linear                                                  |  |

765 training, we pre-train each model for 60 epochs with the MSE objective only. Under WGAN-GP  
 766 framework [30], we use the gradient penalty of 10 and update the encoders/decoders for every 5  
 767 iterations. The parameters  $\lambda$  controlling the tradeoff are in Table 7. Training takes 2 days per model  
 768 on a single NVIDIA P100 GPU. For the MovingMNIST factor of two bound and permanence of  
 error experiments, we repeat the training 3 times.

**Table 6:** Rate, embedding dimension  $d_m$ ,  $d_r$  and quantization level  $L$ .

| (a) P-frame encoder, $R_1 = \infty$ . |       |       |     | (b) P-frame encoder, $R_1 = \epsilon$ (12 bits). |           |     |
|---------------------------------------|-------|-------|-----|--------------------------------------------------|-----------|-----|
| $R_2$                                 | $d_m$ | $d_r$ | $L$ | $R_2$                                            | $d_{enc}$ | $L$ |
| 1 bit                                 | 1     | 0     | 2   | 4 bit                                            | 4         | 2   |
| 2 bits                                | 1     | 1     | 2   | 8 bits                                           | 8         | 2   |
| 3.17 bits                             | 1     | 1     | 3   | 12 bits                                          | 12        | 2   |

### 770 J.3 Permanence of Error on KTH Datasets

771 The KTH dataset is a widely-used benchmark dataset in computer vision research, consisting of video  
 772 sequences of human actions performed in various scenarios. We show more examples supporting  
 773 our argument for the permanence of error on this realistic dataset. We use 16 bits for each frame. In  
 774 general, the 0-PLF-JD decoder consistently outputs correlated but incorrect reconstructions due to the  
 775 error induced by the first reconstructions, i.e., the P-frames will follow the wrong direction induced  
 776 from the I-frame reconstruction. Besides the moving direction, we also notice that the type of actions  
 777 (i.e. walking, jogging, and running) is also affected. On the other hand, while losing some temporal  
 778 cohesion, MMSE and 0-PLF FMD decoders manage to fix the movement error.

### 779 J.4 RDP Tradeoff for 3 frames

780 We extend our experimental results for the RDP-tradeoff and the principal of universality to the case  
 781 of GOP size 3. As mentioned in the main paper, while the universal model only requires MMSE  
 782 representations, the optimal end-to-end model also requires the MMSE reconstructions from previous  
 783 frames to provide best estimates for motion flow vectors. Practically, this is challenging for our  
 784 employed architecture since only previous  $\hat{X}_1, \hat{X}_2$  are available. As a result, to compare the RDP

**Table 7:** Perception loss and their associated  $\lambda$ 

| Perception Loss               | $\lambda \times 10^{-3}$                                                              |
|-------------------------------|---------------------------------------------------------------------------------------|
| Joint Distance (JD)           | 0.0, 0.7, 1.0, 1.15, 1.2, 1.25, 1.3, 1.5, 1.7<br>2.0, 3.0, 5.0, 8.0, 10.0, 40.0, 80.0 |
| Frame Marginal Distance (FMD) | 0.0, 0.4, 0.7, 1.0, 1.5, 2.0, 2.5, 3.0, 3.5, 4.0, 7.0, 10.0, 40.0                     |

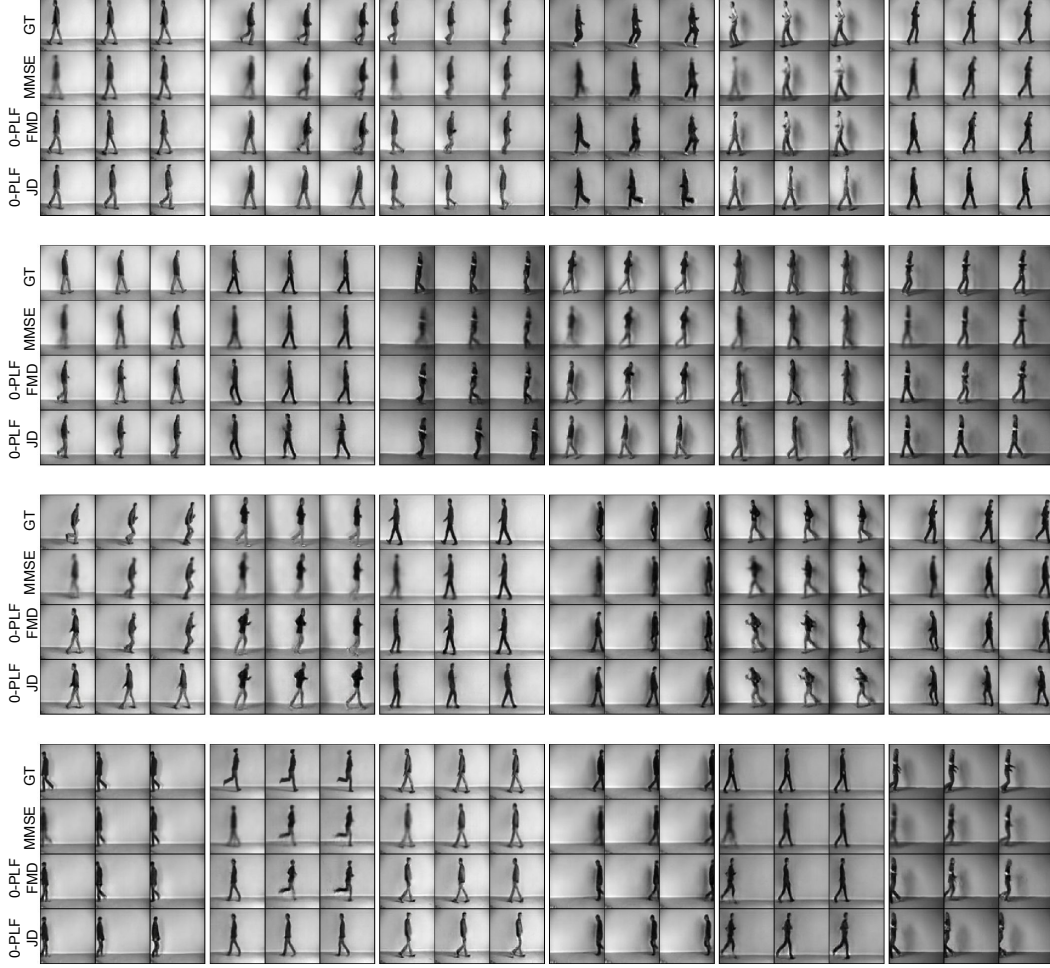**Figure 7:** Additional Experimental Results for the Permanence of Error Phenomenon on KTH Dataset.

tradeoff between universal and end-to-end model, we also provide the end-to-end model with the MMSE estimate from previous frames while noting that this is unfeasible in practice. Interestingly, we show in Figure 8 the RDP tradeoff curves for the third frame  $X_3$  and its reconstruction  $\hat{X}_3$ , observing that the universal and optimized curves are still relatively close to each other. When  $(R_1, R_2, R_3) = (\infty, \epsilon, \epsilon)$ , we note that the distortion for  $X_3$  is larger than  $X_2$  since the allocated rate is not enough to correct the motion. Finally, for the case  $(R_1, R_2, R_3) = (\epsilon, \epsilon, \epsilon)$ , we note that the curves again converge as in the case of  $(R_1, R_2) = (\epsilon, \epsilon)$  due to the incorrect reconstruction in the I-frame.

## J.5 Diversity and Correlation

When  $(R_1, R_2) = (\infty, \epsilon)$ , our theoretical analysis predicted that the decoder optimized for JD is capable of producing diverse reconstructions. On the other hand, an optimized decoder for FMD will tend to produce reconstructions that are highly correlated with the previous reconstruction  $\hat{X}_1$ <sup>5</sup>. In

<sup>5</sup> $X_1 = \hat{X}_1$  in this regime.

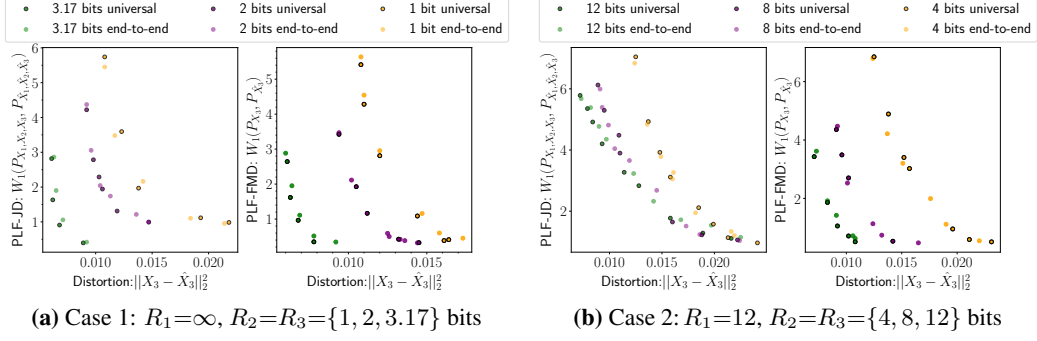

**Figure 8:** RDP tradeoff curves for end-to-end and universal models. We plot the tradeoff for the two regimes:  $R_1=\infty$  and  $R_1=\epsilon$  in (a) and (b) respectively. The universal and optimal curves are close to each other.

**Table 8:** Diversity (a) between  $\hat{X}_2$  and Correlation Measures (b) between  $\hat{X}_2$  and  $X_1$ .

| (a) Diversity Measures $\uparrow$ |        |          | (b) Correlation Measures $\uparrow$ |        |          |
|-----------------------------------|--------|----------|-------------------------------------|--------|----------|
| $R_2$                             | Joint  | Marginal | $R_2$                               | Joint  | Marginal |
| 1 bit                             | 0.0096 | 0.0004   | 1 bit                               | 0.5218 | 0.6202   |
| 2 bits                            | 0.0082 | 0.0029   | 2 bits                              | 0.5190 | 0.5969   |
| 3.17 bits                         | 0.0042 | 0.0022   | 3.17 bits                           | 0.5205 | 0.5508   |

our experiment, we also observe such behavior, summarized in Table 8 and show several examples for  $R_2 = 2$  bits in Figure 9. We observe that reconstructions from the joint metric deviate more randomly from  $X_1$  than the marginal reconstructions. The marginal reconstructions, on the other hand, stay much closer to their original reconstruction  $\hat{X}_1$ .

We measure the diversity in  $\hat{X}_2$  reconstruction using  $E[\text{Var}(\hat{X}_2|X_1, X_2)]$  and the correlation with  $\hat{X}_1$  by  $E[\text{sim}(\hat{X}_2, X_1)]$ , where  $\text{sim}(u, v)$  is the cosine distance between  $u, v$ . Table 8a shows that as we increase the number of bits in  $R_2$ , the diversity decreases as the decoder can reconstruct the frame more precisely. In Table 8b, we see that the joint metric keeps the correlation relatively constant, showing that it actually preserves the temporal consistency. On the other hand, as the rate becomes larger, 0-PLF-FMD reconstruction tends to be less correlated with the previous frame  $X_1$ . Finally, we note that our architecture innately utilizes common randomness to produce diverse reconstructions and does not suffer from mode-collapse behavior in general conditional GAN settings [41].

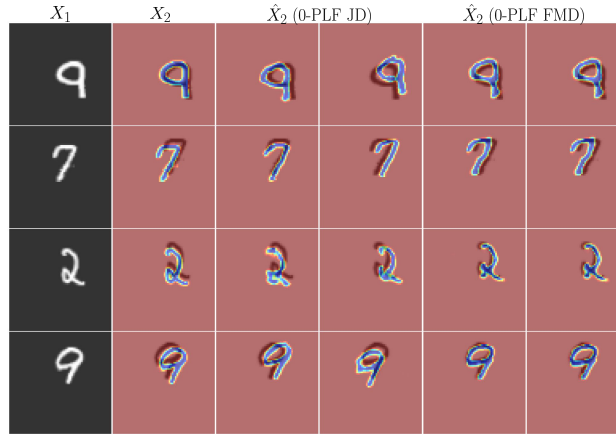

**Figure 9:** Diversity in reconstruction  $\hat{X}_2$  for 0-PLF-JD and correlation with previous frames  $\hat{X}_1$  for 0-PLF-JMD. We show  $X_1$  in the first column. From the second column, the light-dark region represents  $X_1$  and the color digit represents  $X_2, \hat{X}_2$ . For each perception metric, we show two samples.

## 808 **K Limitations**

809 This work studies the effects of different perception loss functions, namely the PLF-JD and PLF-FMD,  
810 on the performance of lossy causal video compression. Our theoretical analysis and experiment  
811 reveal the error permanence phenomenon and show the universality principle, suggesting that MMSE  
812 representation can be transformed into other points on the DP tradeoffs.

813 In practice, one might want to combine these two losses, for example, perfect framewise realism  
814 (0-PLF FMD) while retaining some degree of temporal cohesion (PLF-JD small), which is not  
815 considered in this work. Furthermore, analysis for other types of video compression schemes, such  
816 as with B-frame, and scaling the universality compression architecture to high-definition videos are  
817 also desired.
